# Supplementary material for: Engineering of an archaeal phosphodiesterase to trigger aggregation-induced emission (AIE) of synthetic substrates
Source: Royal Society of Chemistry journal article supplement (doi:10.1039/d0nj03208e), 2020-01-01

Electronic Supplementary Information for:

**Engineering of an Archaeal Phosphodiesterase to Trigger Aggregation-Induced Emission  
(AIE) of Synthetic Substrates**

Yunlong Zhang, Zhiyuan Wu, Ippei Takashima, Nobuyuki Matsumoto, Kathy-Uyen Nguyen,  
and Jonathan S. Lindsey

| <b>Table of Contents</b>                                                                 | <b>Page</b> |
|------------------------------------------------------------------------------------------|-------------|
| <b>1. Further information concerning enzyme engineering procedures</b>                   | <b>S1</b>   |
| <b>2. Additional data concerning enzyme engineering</b>                                  |             |
| Figure S1, SDS-PAGE of PDE-MJ0936 monomer                                                | S3          |
| Figure S2, MALDI-TOF-MS of PDE-MJ0936 monomer                                            | S3          |
| Figure S3, Effects of pH to the enzymatic activity of PDE-MJ0936                         | S4          |
| Figure S4, Mutation residues of PDE-MJ0936                                               | S4          |
| Figure S5, BLASP alignment of PDE-MJ0936 and YfcE                                        | S5          |
| Table S1, List of the PDE mutants                                                        | S5          |
| Figure S6, Selection of PDE mutants with the substrates <b>1</b> , <b>2</b> and <b>3</b> | S6          |
| Figure S7, Initial rate of C141D at pH 7.0 and 20 °C                                     | S7          |
| Figure S8, FPLC trace of two batches of C141D purification                               | S8          |
| Figure S9, Absorption spectra of <b>1–3</b> in ethanol                                   | S8          |
| <b>3. <sup>1</sup>H and <sup>13</sup>C NMR data for new synthetic compounds</b>          | <b>S9</b>   |

**1. Further information concerning enzyme engineering procedures**

**PCR for site-directed mutagenesis.** With pure pLIC.B2.MJ0936, site-directed mutagenesis was carried out by using Q5 site-directed mutagenesis kit with the following PCR method. In a 25- $\mu$ L PCR tube, 1  $\mu$ L of DNA template, 9  $\mu$ L of H<sub>2</sub>O, 1.25  $\mu$ L of forward primer (see Table 2), 1.25  $\mu$ L of reverse primer (see Table 2) and 12.5  $\mu$ L of Q5 Hot-Start Master Mix were mixed for PCR. Initial denaturation was at 98 °C for 30 s. Annealing and elongation (40 cycles) were as follows: 98 °C for 10 s, T<sub>a</sub> (see Table 2) for 20 s and 72 °C for 3 min. Final extension was as follows: 72 °C for 3 min. Then the sample was cooled down to 4 °C for electrophoresis.

**KLD reaction and transformation.** A sample of 100  $\mu$ L of frozen *E. coli* stock (Top10 for plasmid storage or BL21 for protein expression) was slowly thawed on ice. The PCR product

(1  $\mu\text{L}$ ) was mixed with 2 $\times$  KLD buffer (5  $\mu\text{L}$ ), 10 $\times$  KLD enzyme mix (1  $\mu\text{L}$ ) and ddH<sub>2</sub>O (3  $\mu\text{L}$ ) and reacted at room temperature for 5 min. The reaction mixture (5  $\mu\text{L}$ ) was added to the freshly thawed *E. coli* stock and mixed by gentle finger agitation (flicking) the tube. Then the cell stock was incubated on ice for 30 min, followed by a quick heat-shock at 42 °C in a water bath for exactly 45 s. The cells were immediately cooled down on ice for 5 min after heat-shock. A sample of SOC outgrowth media (900  $\mu\text{L}$ ) was added to the cooled cells, and the mixture was incubated at 37 °C for 1 h. Afterwards, 100  $\mu\text{L}$  of the cell culture was spread on an LB/Amp agar plate. The grown colonies contain the PCR-amplified plasmid. For protein expression, after colony selection (*vide infra*), the pure strain was frozen for a second round of transformation with the helper plasmid pSJS1240, which is used to increase the protein yield of archaeal proteins. To spread and grow *E. coli* containing pSJS1240, LB/Amp/Sp plate and media were used.

**Protein fractionation and purification.** TALON cobalt affinity resin was loaded into a Bio-Rad Econo-Pac® plastic column to prepare a 10-mL affinity column. The flow rate was 3 mL/min for all steps except 1 mL/min for elution. The column was washed and equilibrated with 50 mL of running buffer (20 mM Na<sub>3</sub>PO<sub>4</sub>, 0.5 M NaCl, 5 mM imidazole, pH 7.4). Then the cell lysate (~ 9 mL) was loaded and flowed through. 100 mL of running buffer was loaded to wash the column. Afterwards, 50 mL of elution buffer (20 mM Na<sub>3</sub>PO<sub>4</sub>, 0.5 M NaCl, 500 mM imidazole, pH 7.4) was used to elute the proteins bound to the column. The collection volume was 2 mL. 5  $\mu\text{L}$  of each eluent was added to 195  $\mu\text{L}$  of 2 mM bis-*p*NPP (in PDE buffer) for an incubation at 60 °C for 30 min to select the active PDE fractions.

The purity of the previous PDE fraction (crude PDE) was roughly ~60%, which was used for a qualitative assay. Purer protein was obtained by the following method for quantitative assays. Buffer A (20 mM Tris, 100 mM NaCl, 1 mM EDTA, 1 mM dithiothreitol, pH 7.5) and Buffer B (20 mM Tris, 700 mM NaCl, 1 mM EDTA, 1 mM dithiothreitol, pH 7.5) were freshly prepared for FPLC system. Crude PDE was buffer-exchanged with H<sub>2</sub>O in dialysis tubing (molecular weight cut-off 3000 Da) and lyophilized. Then the lyophilized PDE was dissolved in 2 mL of cold buffer A and loaded to a Bio-Rad NGC medium-pressure chromatography system (FPLC). Two HiTrap Q columns (2  $\times$  5 mL) were connected to the FPLC system and equilibrated with 100% buffer A. The flow rate was consistently 5 mL/min. Protein elution was monitored by absorption spectroscopy at 280 nm. FPLC procedures: (1) Equilibration, 2 column volumes (CV), 0% buffer B; (2) Sample application, 5 mL/min; (3) Elution, 10 CV, 0–100% buffer B; (4) Elution, 1 CV, 100% buffer B; (5) Column wash: 1 CV, 100–0% buffer B. The collection volume of eluents was 3 mL. 5  $\mu\text{L}$  of each eluent was added to 195  $\mu\text{L}$  of 2 mM bis-*p*NPP (in PDE buffer) for an incubation at 60 °C for 30 min to select the active PDE fractions. An FPLC trace is shown in Figure S1. PDE fractions were buffer-exchanged with H<sub>2</sub>O by dialysis and then lyophilized. The purity of the PDE (or mutants) was >95% (by SDS-PAGE).

## 2. Additional data concerning enzyme engineering

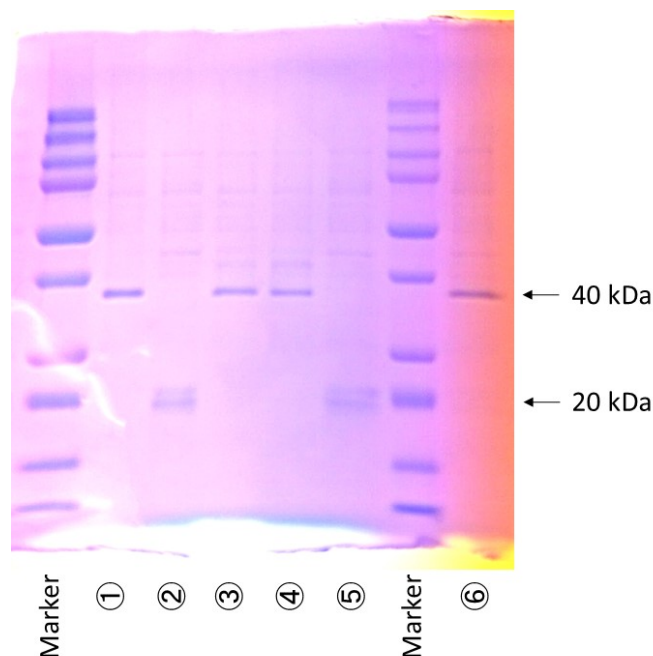

**Figure S1.** SDS-PAGE of PDE-MJ0936 using a 12% acrylamide gel under denaturing conditions: (1) Non-treated; (2) reductants (1 M  $\beta$ -mercaptoethanol + 30 mM dithiothreitol) and heating (99 °C  $\times$  3 min); (3) 6% Triton X-100 and heating; (4) 8 M urea and heating; (5) all additives in runs (2–4) + heating; and (6) all additives in runs (2–4) without heating. Loading: PDE-MJ0936 is 0.24 pmol.

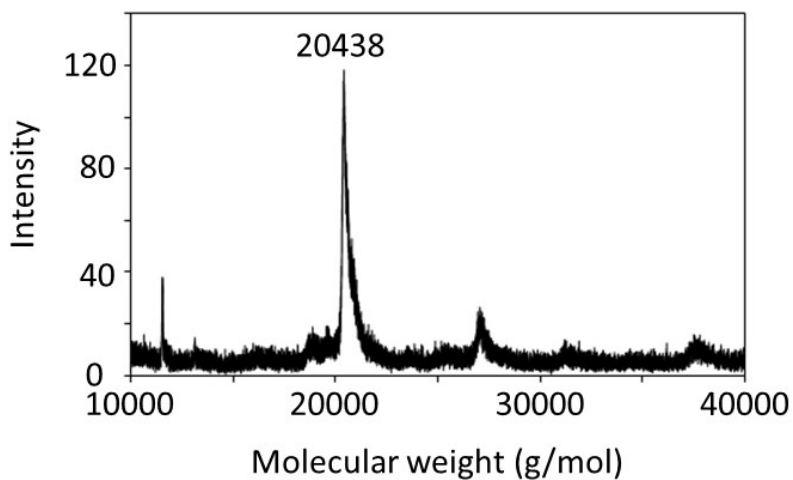

**Figure S2.** MALDI-TOF-MS spectrum of PDE-MJ0936 with the matrix sinapinic acid.

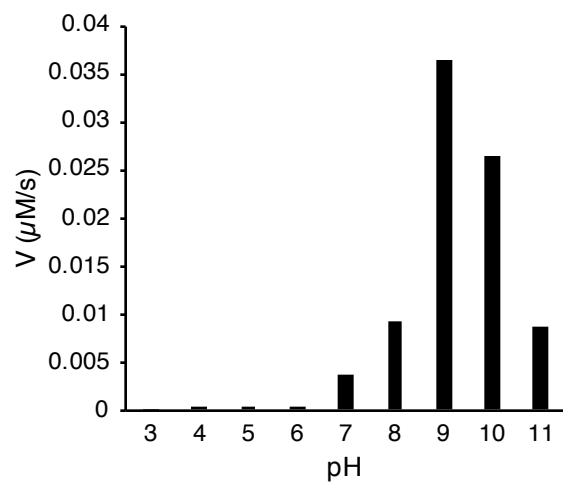

**Figure S3.** Effect of pH on the enzymatic activity of PDE-MJ0936 (all at 60 °C). The substrate was bis-*p*NPP.

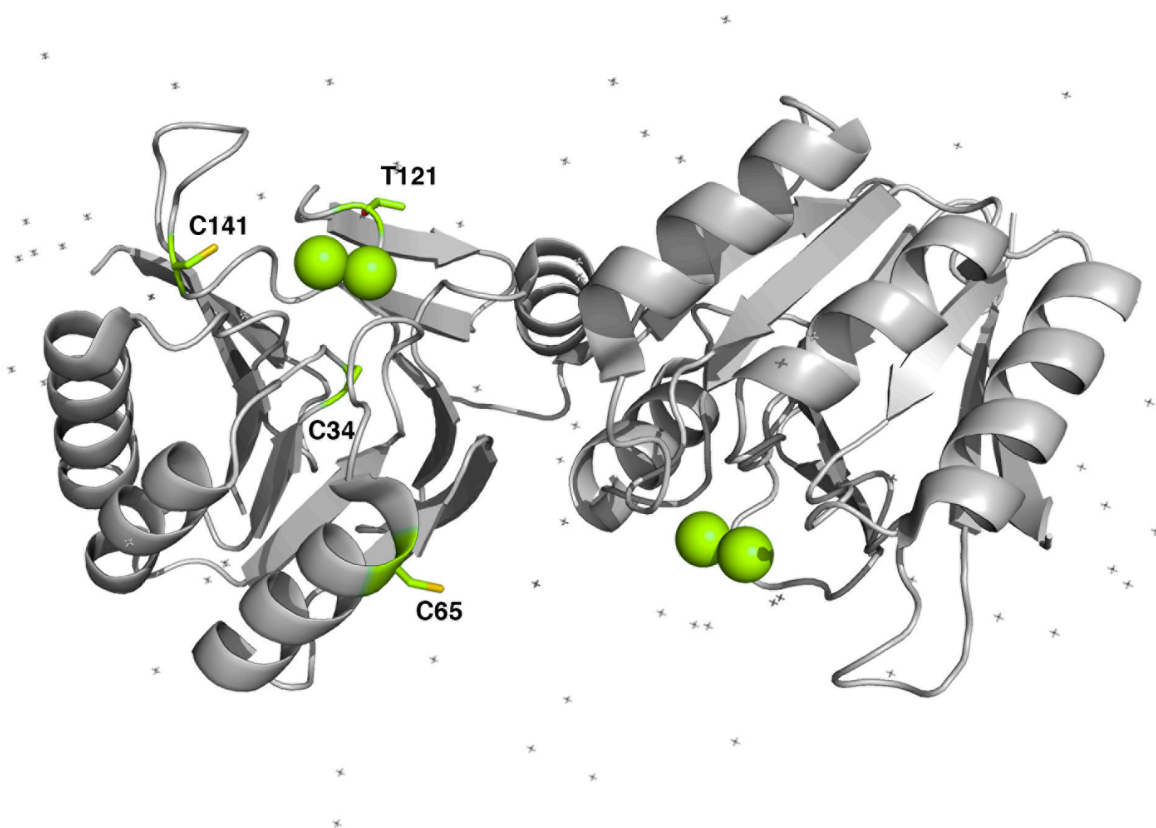

**Figure S4.** Crystal structure of PDE-MJ0936 with Ni<sup>2+</sup> (PDB #: 1S3M). Mutation sites in a monomer are labeled. Each H<sub>2</sub>O molecule is indicated by a cross.

YfcE family phosphodiesterase [Candidatus Atribacteria bacterium HGW-Atribacteria-1]  
 Sequence ID: PKP54812.1 Length: 165 Number of Matches: 1

```

                                34
PDE   MKIGIMSDTHDHLPNIRKAIEIFNDENVETVIHCGDFVSLFVIKEFENLNANI IATYGNN
MKIG+MSDTHD+LP I+ A+EI N E VE V+H GDFVS F EF+NLN + +GNN
YfcE  MKIGMMSDTHDNLPQIKI AVEILNREKVELVLHAGDFVSPPTFLEFKNLNCPLKGVFGNN
                                65
PDE   DGERCKLKEWLKDINEENIIDDFISVEIDDLKFFITHGHHQSVLEMAIKSGLYDVVIYGH
DG++ L+E K I E + + V I+ + H + +++ +S YDV+IYGH
YfcE  DGDKLYLQEKFKGIGE--LCPEPYQVNINQKSIIML--HKEGLIDALAESQKYDVIIYGH
                                121 141
PDE   THERVFEEVDDVLVINPGECCGYLTGIPTIGILDTEKKEYREIVL
TH ++ L+INPGEC G+L+G TI +LD + E + I L
YfcE  THRTDLRKIGKTLIINPGECGWLSGKSTIALLDLKNLEAKIINL
  
```

**Figure S5.** Protein alignment (BLASTP) of PDE-MJ0936 and YfcE (GenBank # PKP54812), a bacterial phosphodiesterase. All residues in the active site (red) are conserved (grey highlighted). All cysteines in PDE-MJ0936 and their aligned residues in YfcE are highlighted in yellow.

**Table S1.** Nine PDE mutants to obtain monomeric PDE and/or PDE with broader substrate scope.

| Name  | Amino acid | Feature     | Substitution | Reason             |
|-------|------------|-------------|--------------|--------------------|
| C34A  | Cys        | Not surface | Ala          | YfcE residue       |
| C34D  |            |             | Asp          | negatively charged |
| C65D  | Cys        | Surface     | Asp          | negatively charged |
| C65L  |            |             | Leu          | YfcE residue       |
| C141D | Cys        | Surface     | Asp          | negatively charged |
| C141G |            |             | Gly          | YfcE residue       |

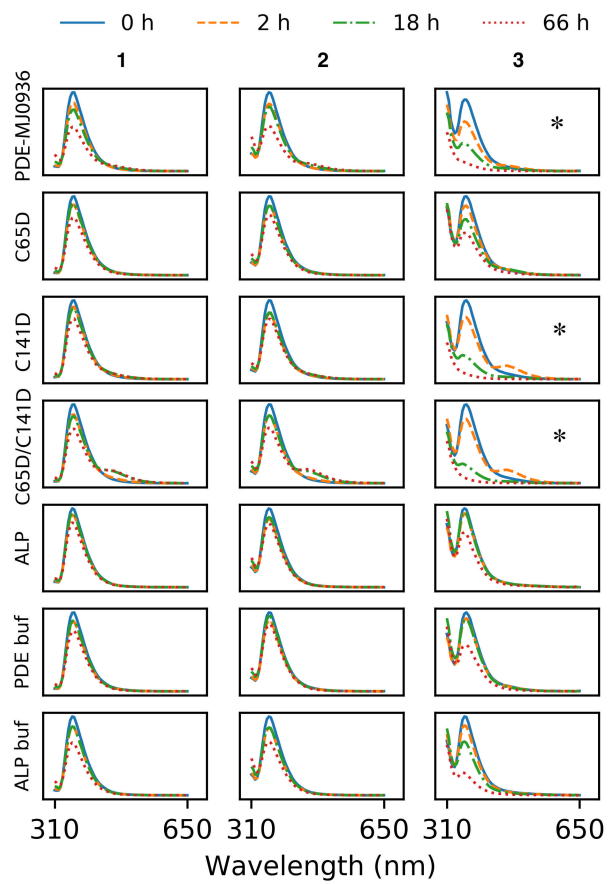

**Figure S6.** Fluorescence signal from PDE mutants with the substrates **1–3** based on AIE. The \* indicates the observation of cloudiness (precipitates) during the assay.

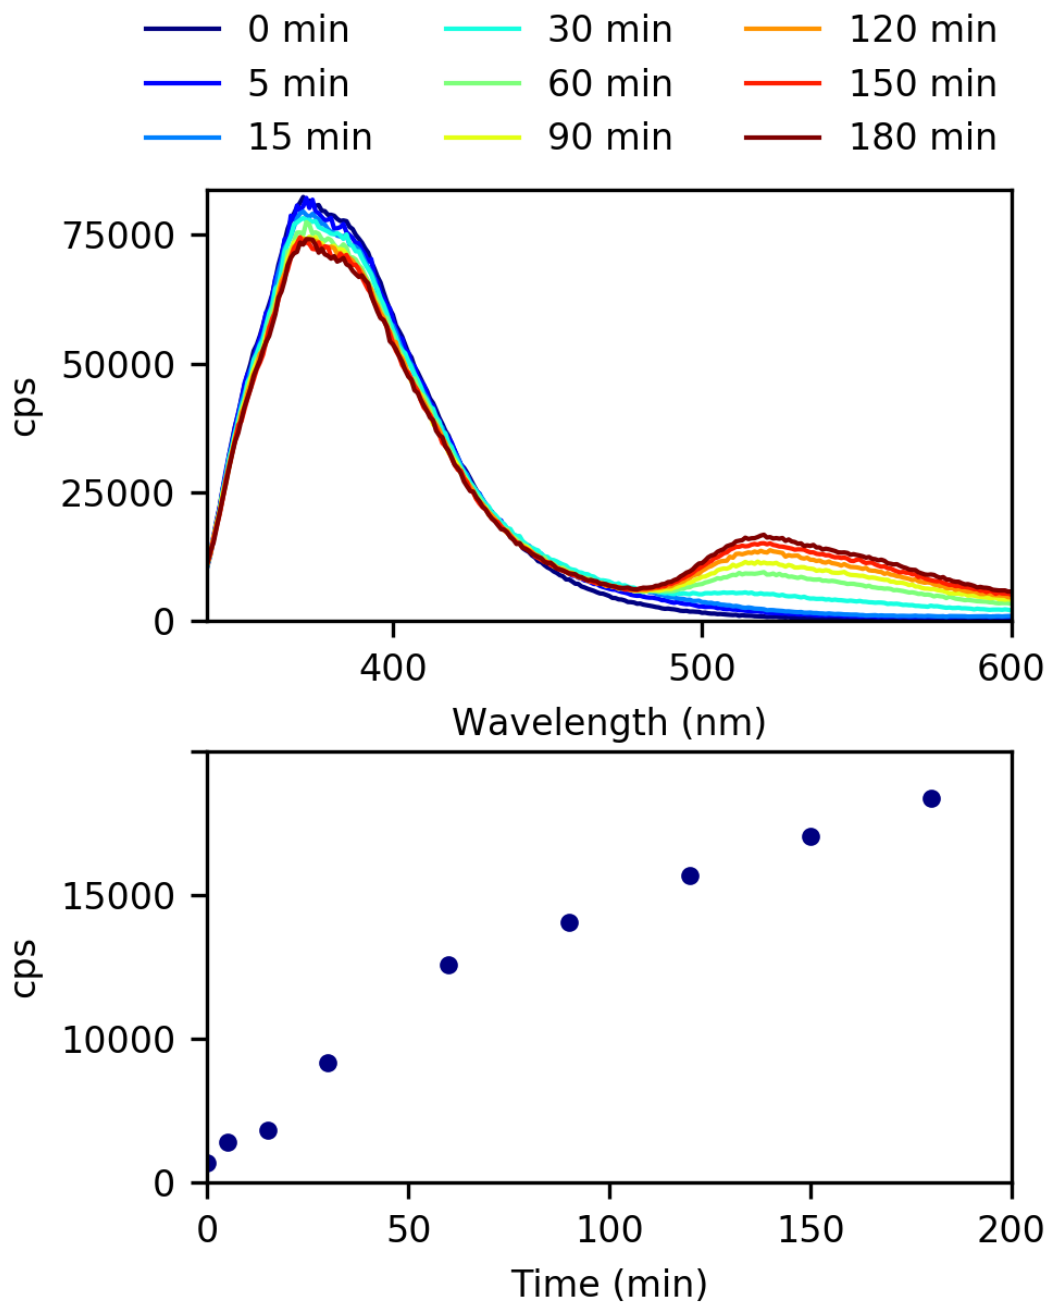

**Figure S7.** Initial rate of hydrolysis of **3** by C141D at pH 7.0 and room temperature ( $\sim 20^\circ\text{C}$ ). No incubation of the plate. Note that the fluorescence at 370 nm comes from the phosphodiester **3**, not the resulting liberated **12**. The fluorescence from **3** has high intensity due to the higher amount compared to that of the newly formed **12**.

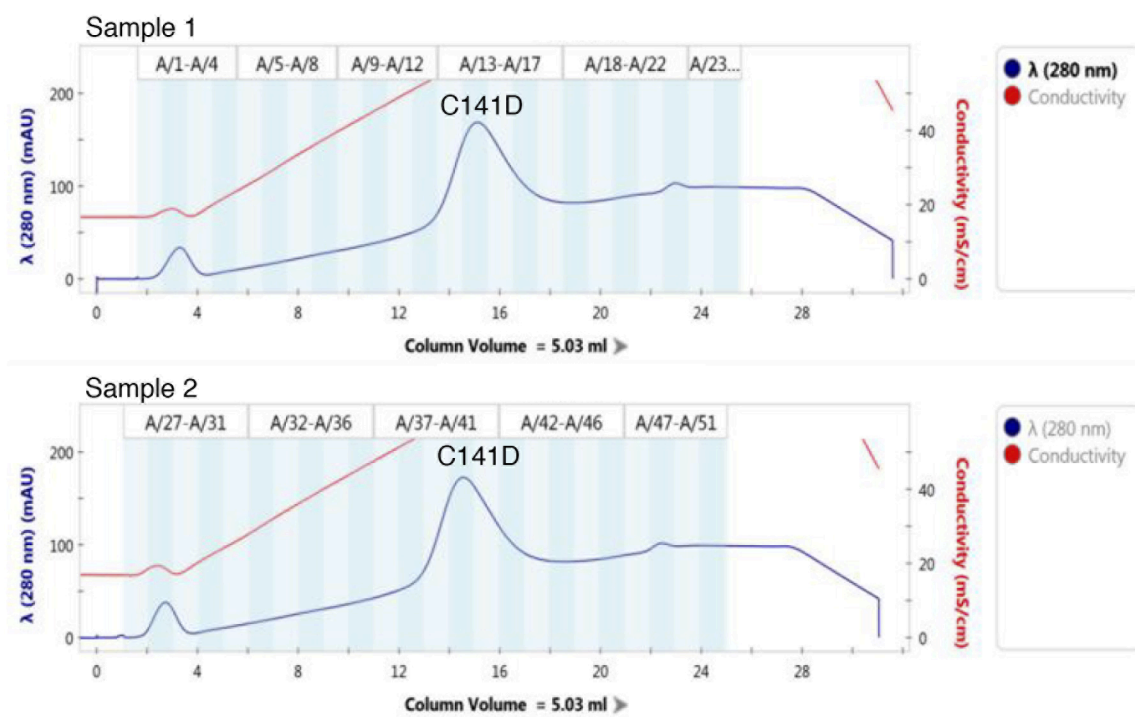

**Figure S8.** FPLC trace of two batches of C141D purification.

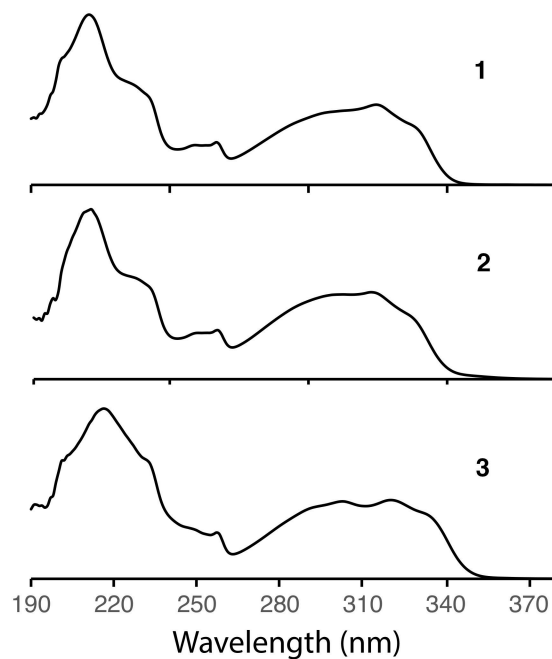

**Figure S9.** Absorption spectra of 1–3 in ethanol at room temperature (1-cm pathlength cuvette).

### 3. $^1\text{H}$ and $^{13}\text{C}$ NMR data for new synthetic compounds



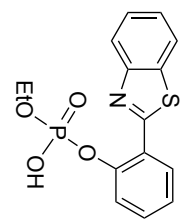

HBT-Pi-Et (1)  
<sup>1</sup>H NMR (CD<sub>3</sub>OD, 300 MHz)

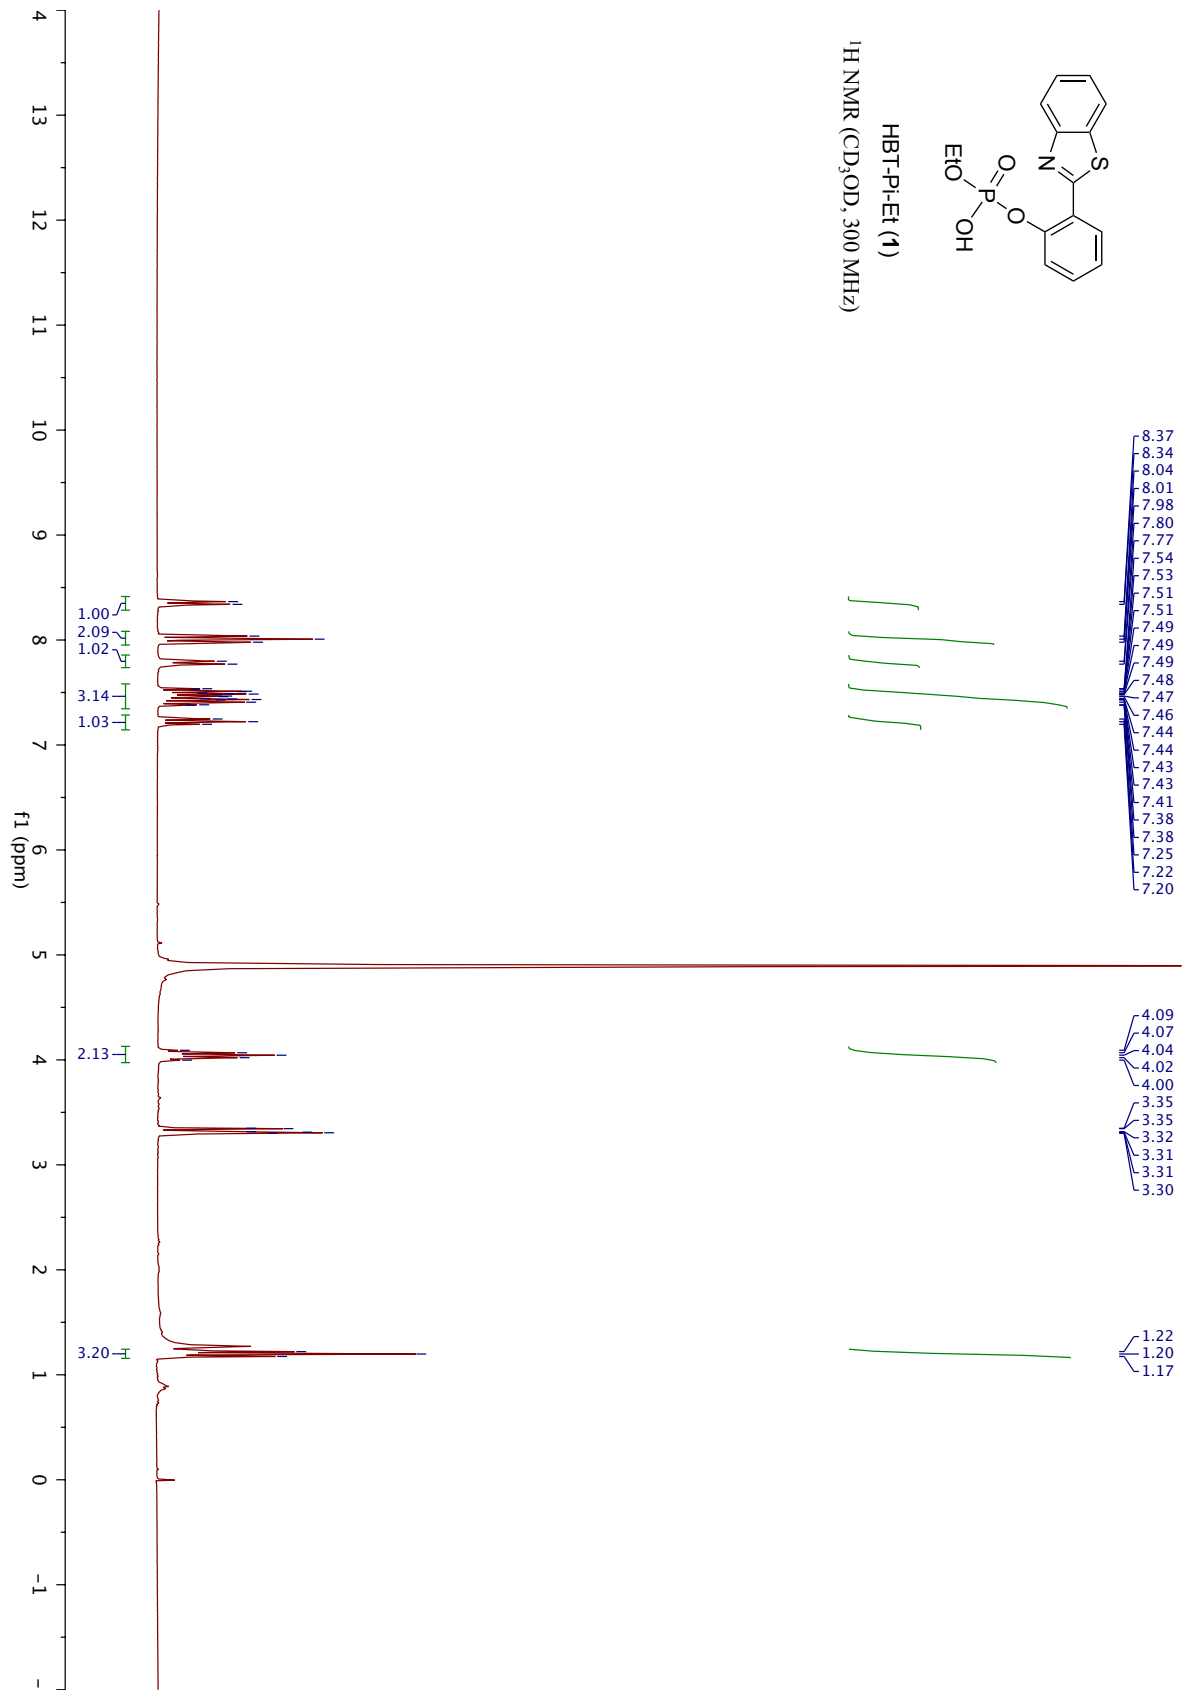

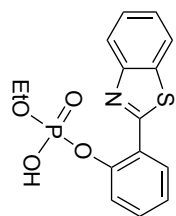

HBT-PI-EI (1)

<sup>13</sup>C NMR (CD<sub>3</sub>OD, 100 MHz)

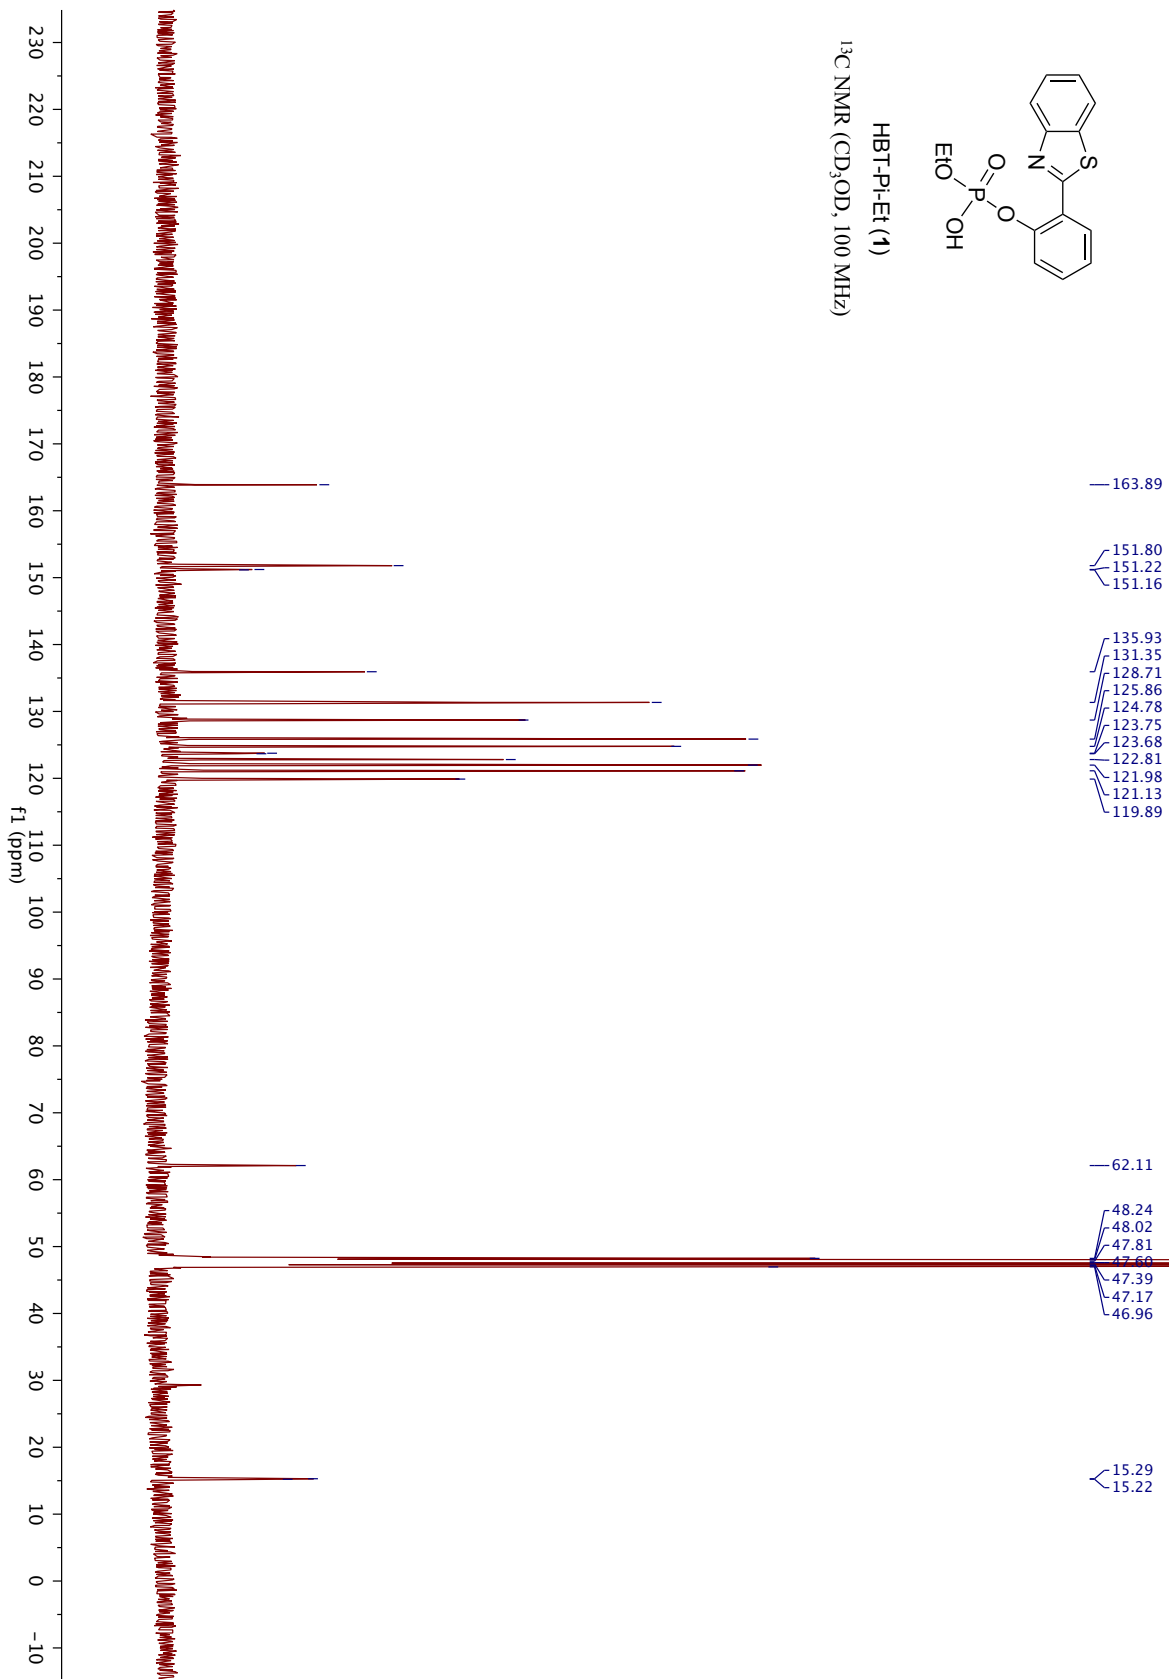

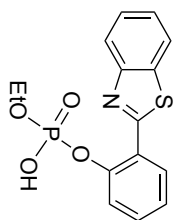

HBT-Pi-Et (1)

$^3\text{P}$  NMR ( $\text{CD}_3\text{OD}$ , 120 MHz)

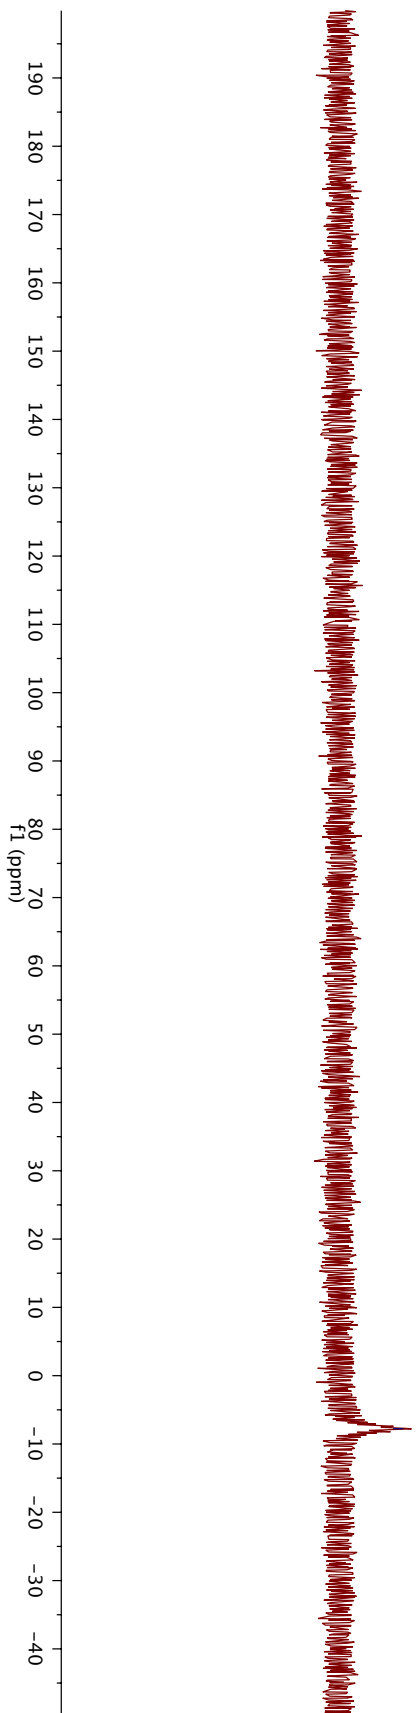

—7.76

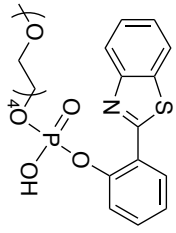

HBT-Pi-MPEG (2)  
<sup>1</sup>H NMR (CDCl<sub>3</sub>, 600 MHz)

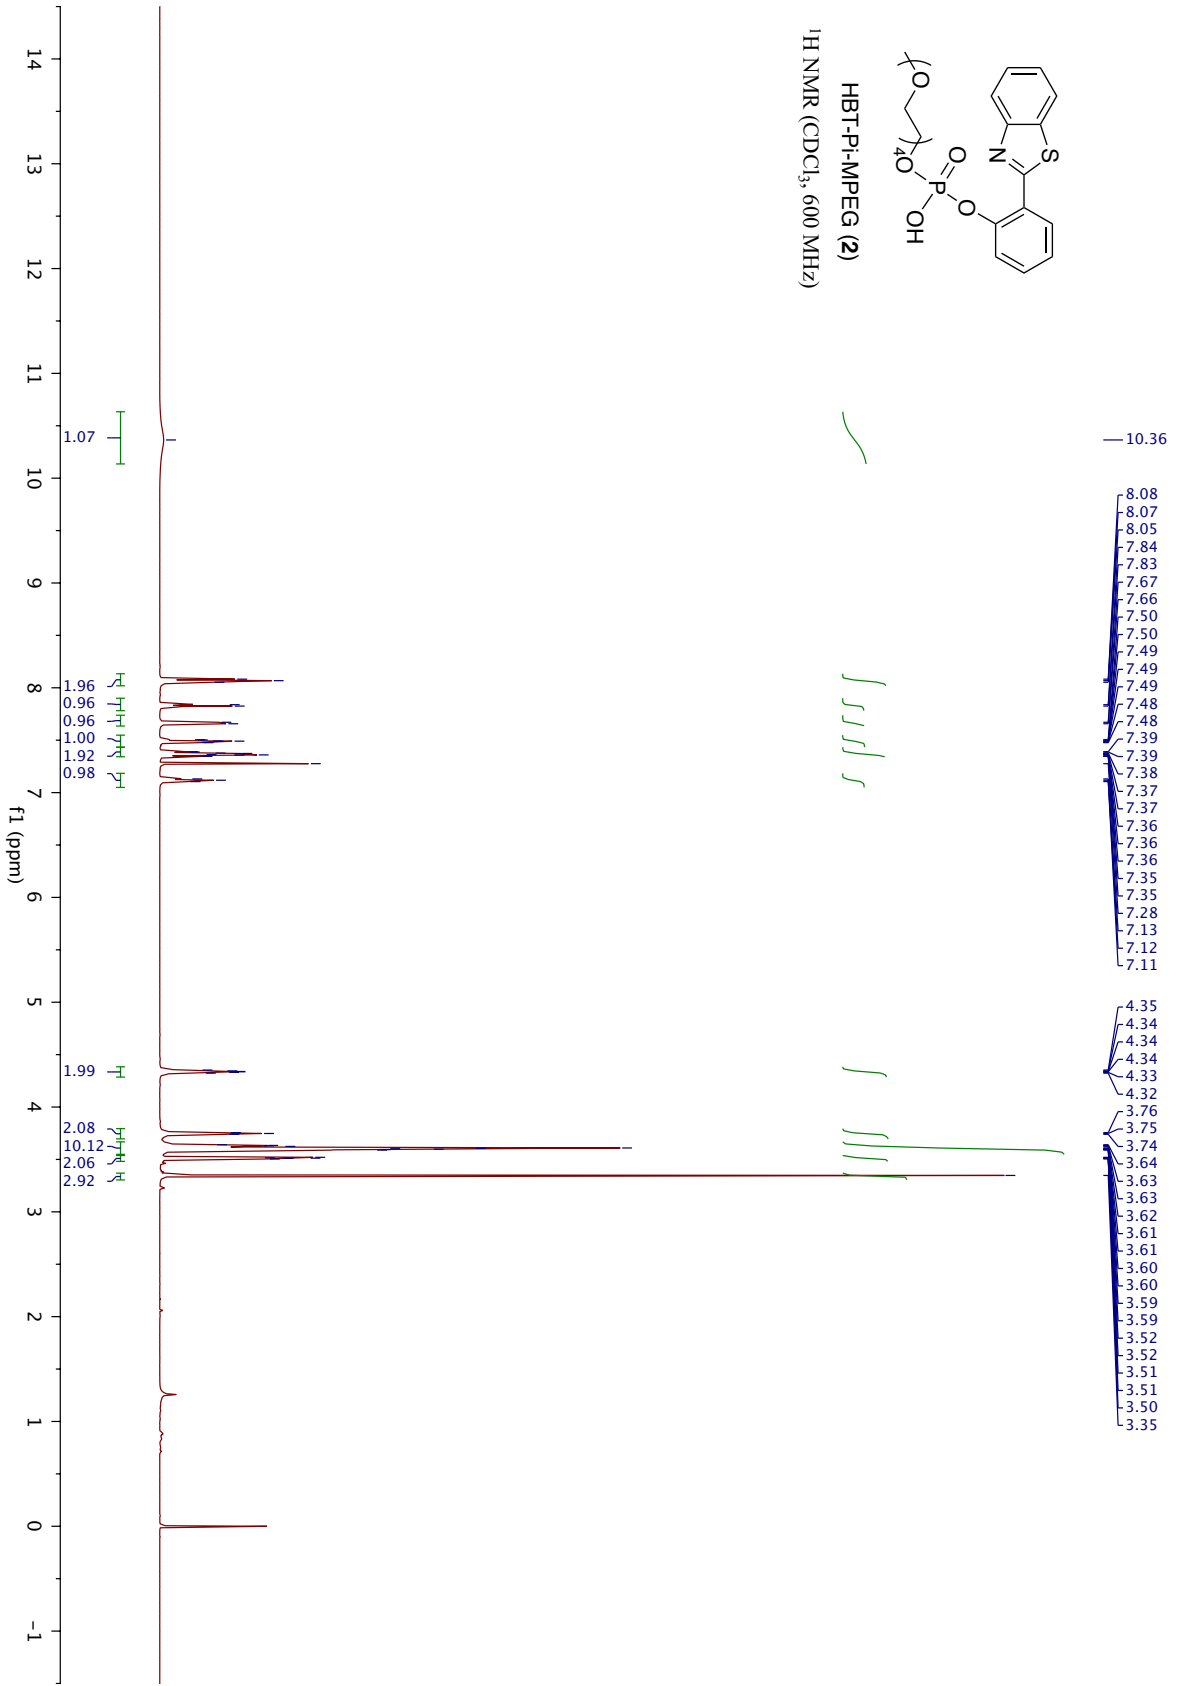

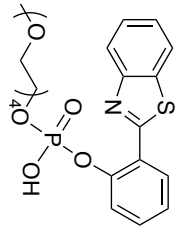

HBT-PI-MPEG (2)

<sup>13</sup>C NMR (CDCl<sub>3</sub>, 150 MHz)

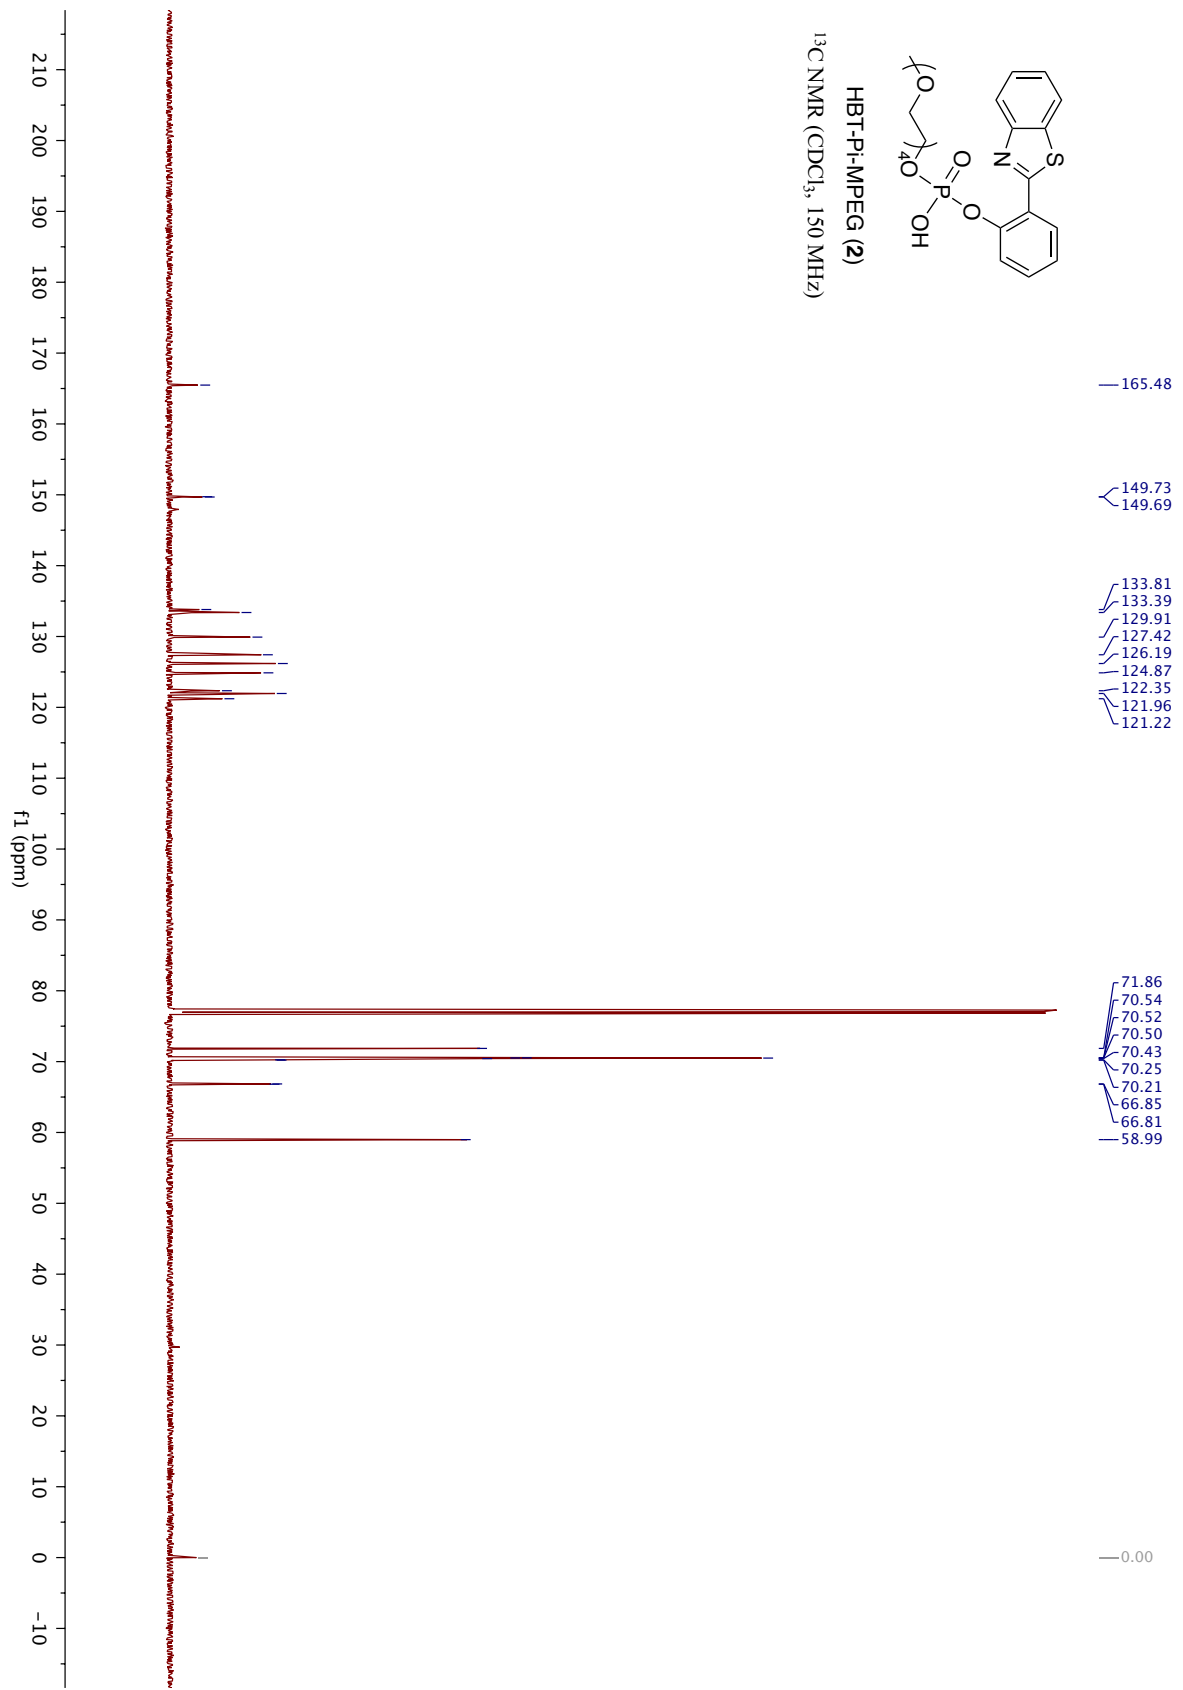

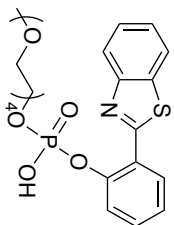

HBT-PI-MPEG (2)

<sup>31</sup>P NMR (CDCl<sub>3</sub>, 160 MHz)

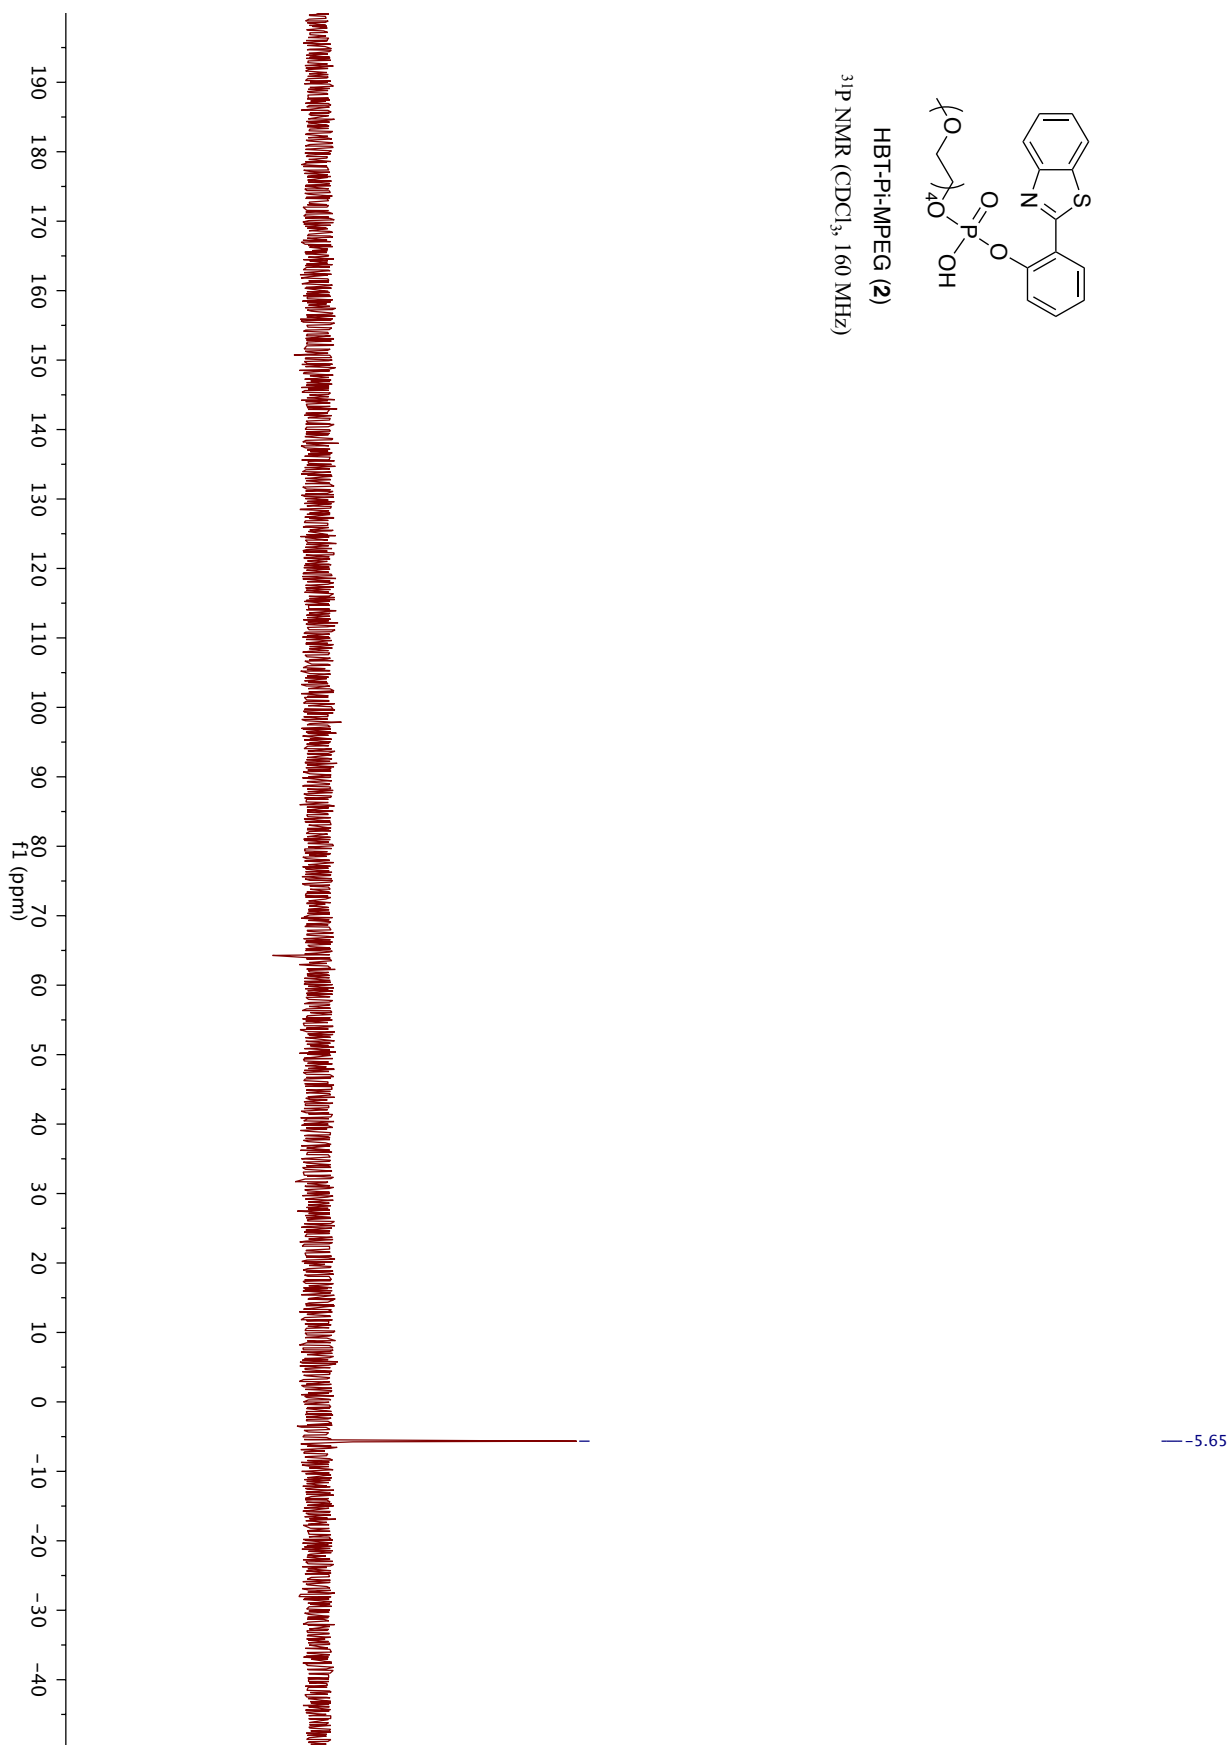

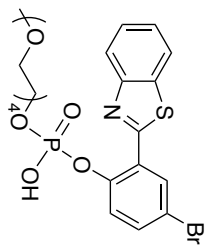

BHBT-PI-MPEG (**3**)

<sup>1</sup>H NMR (CDCl<sub>3</sub>, 600 MHz)

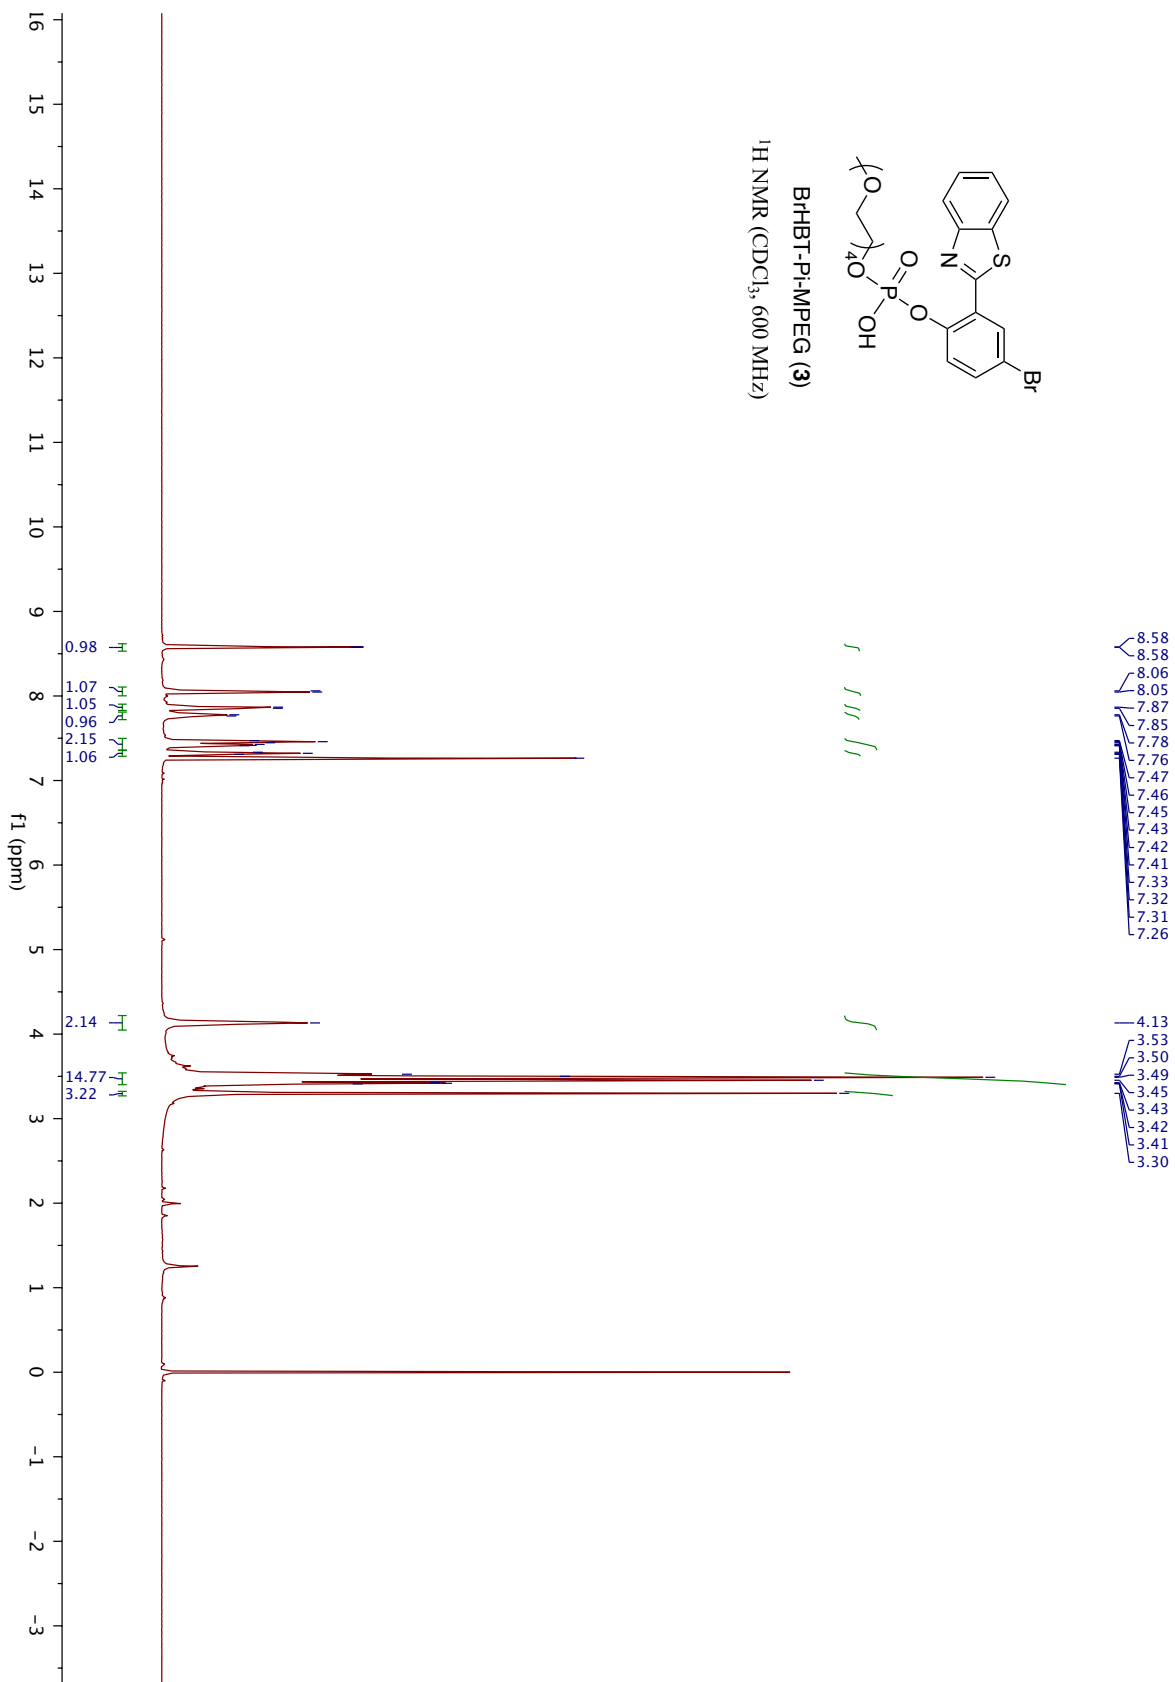

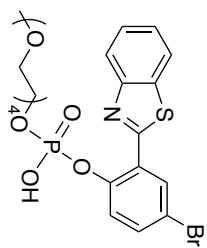

B<sub>4</sub>HBT-PI-MPEG (**3**)

<sup>13</sup>C NMR (CDCl<sub>3</sub>, 150 MHz)

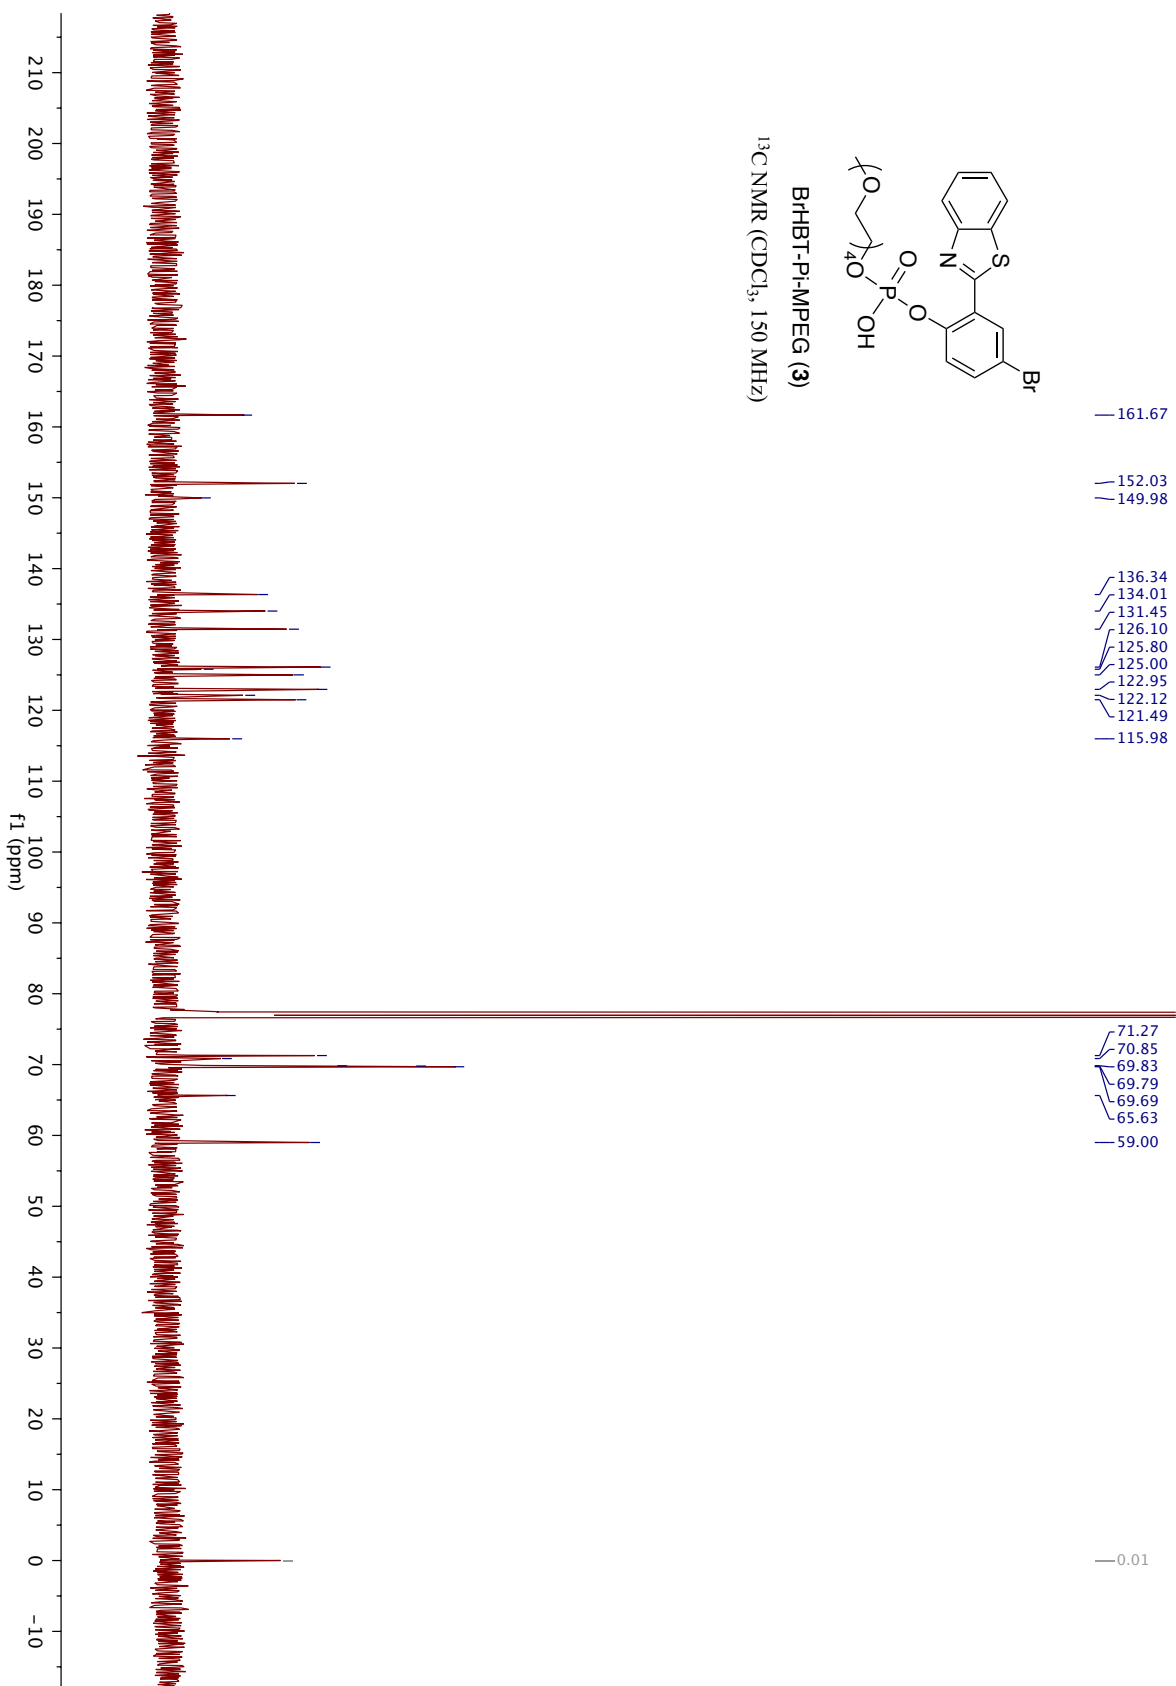



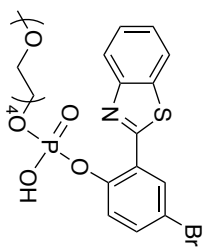

BHBT-PI-MPEG (3)

$^{31}\text{P}$  NMR ( $\text{CDCl}_3$ , 120 MHz)

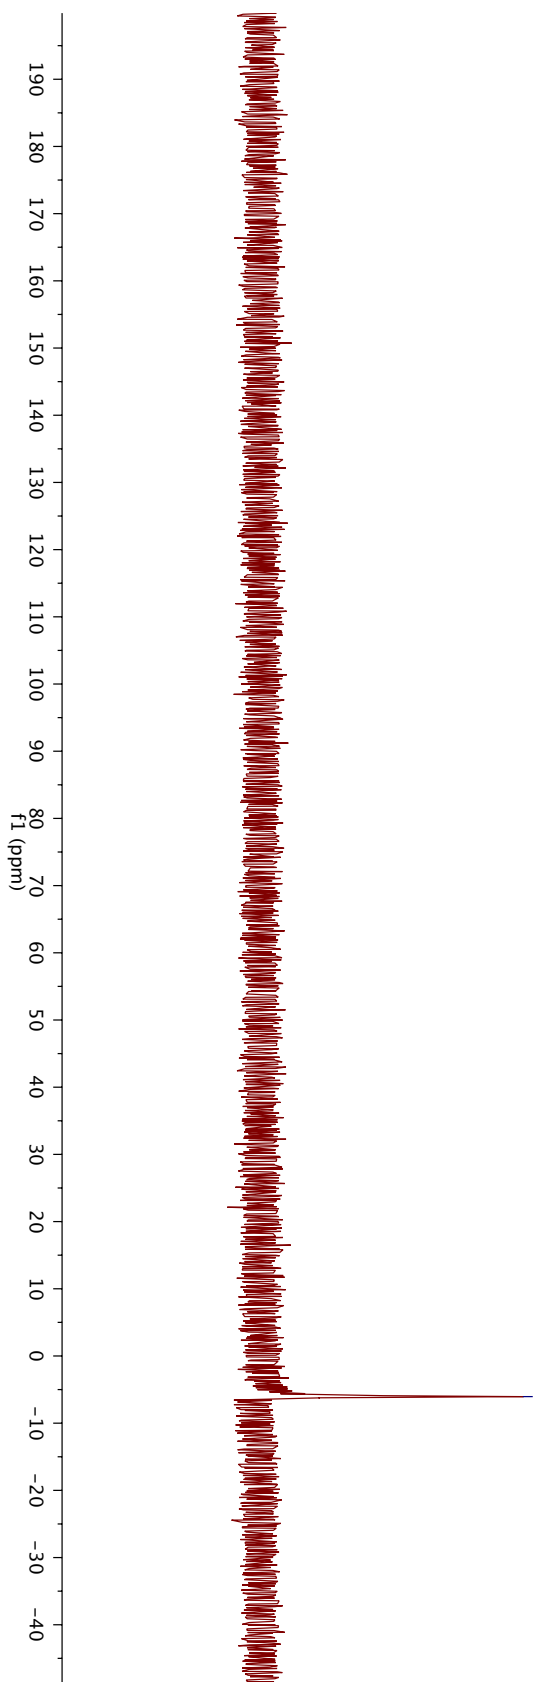

— 6.05

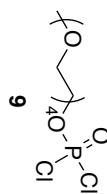

<sup>1</sup>H NMR (CDCl<sub>3</sub>, 300 MHz)

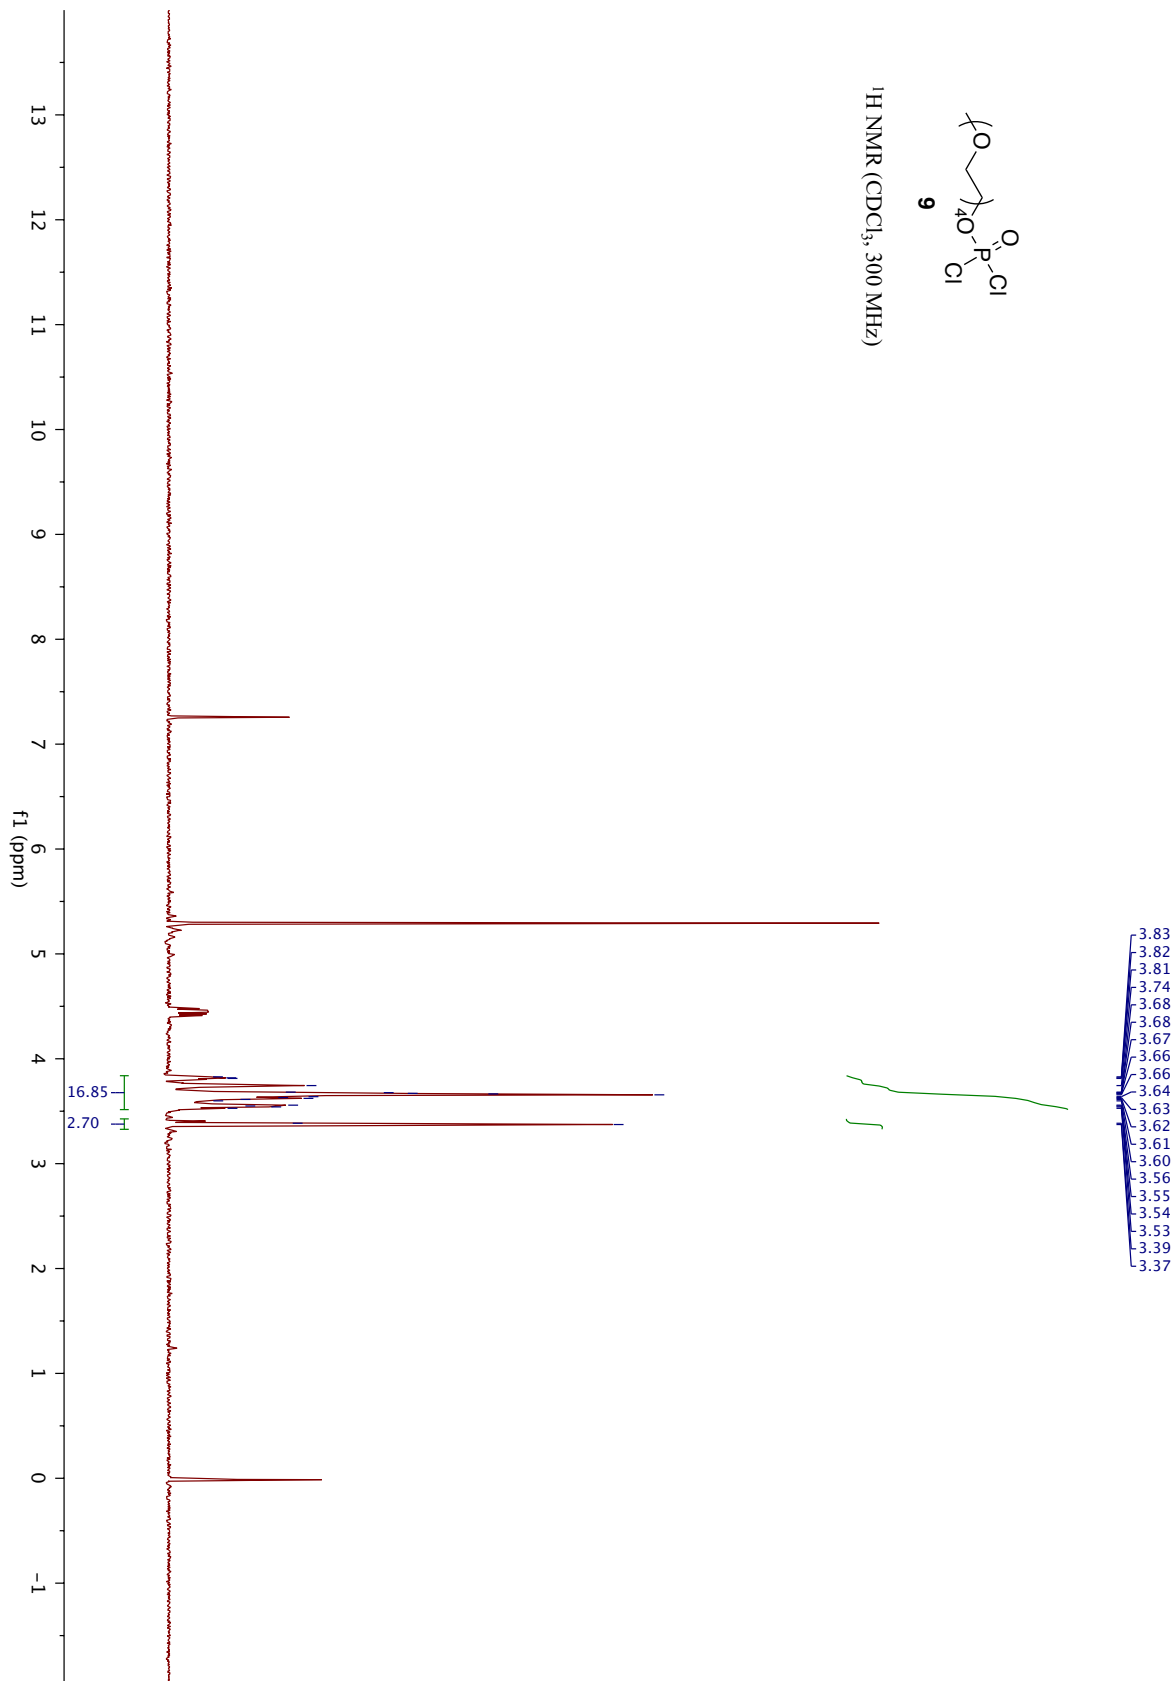

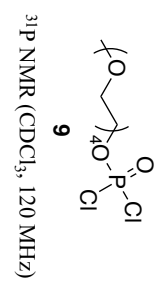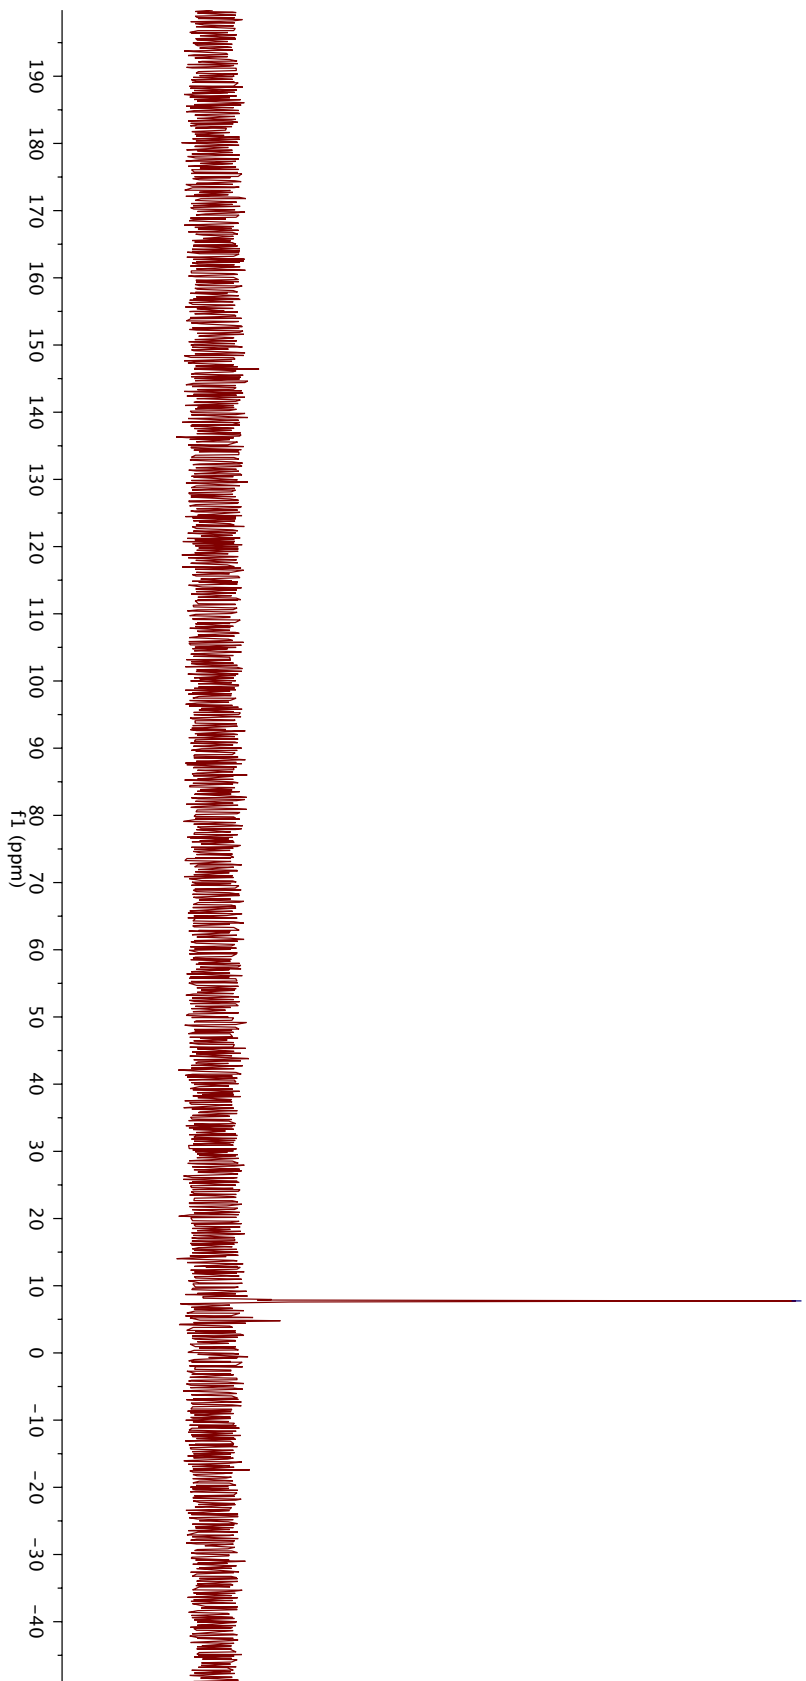

—7.74

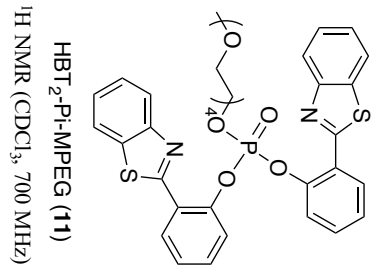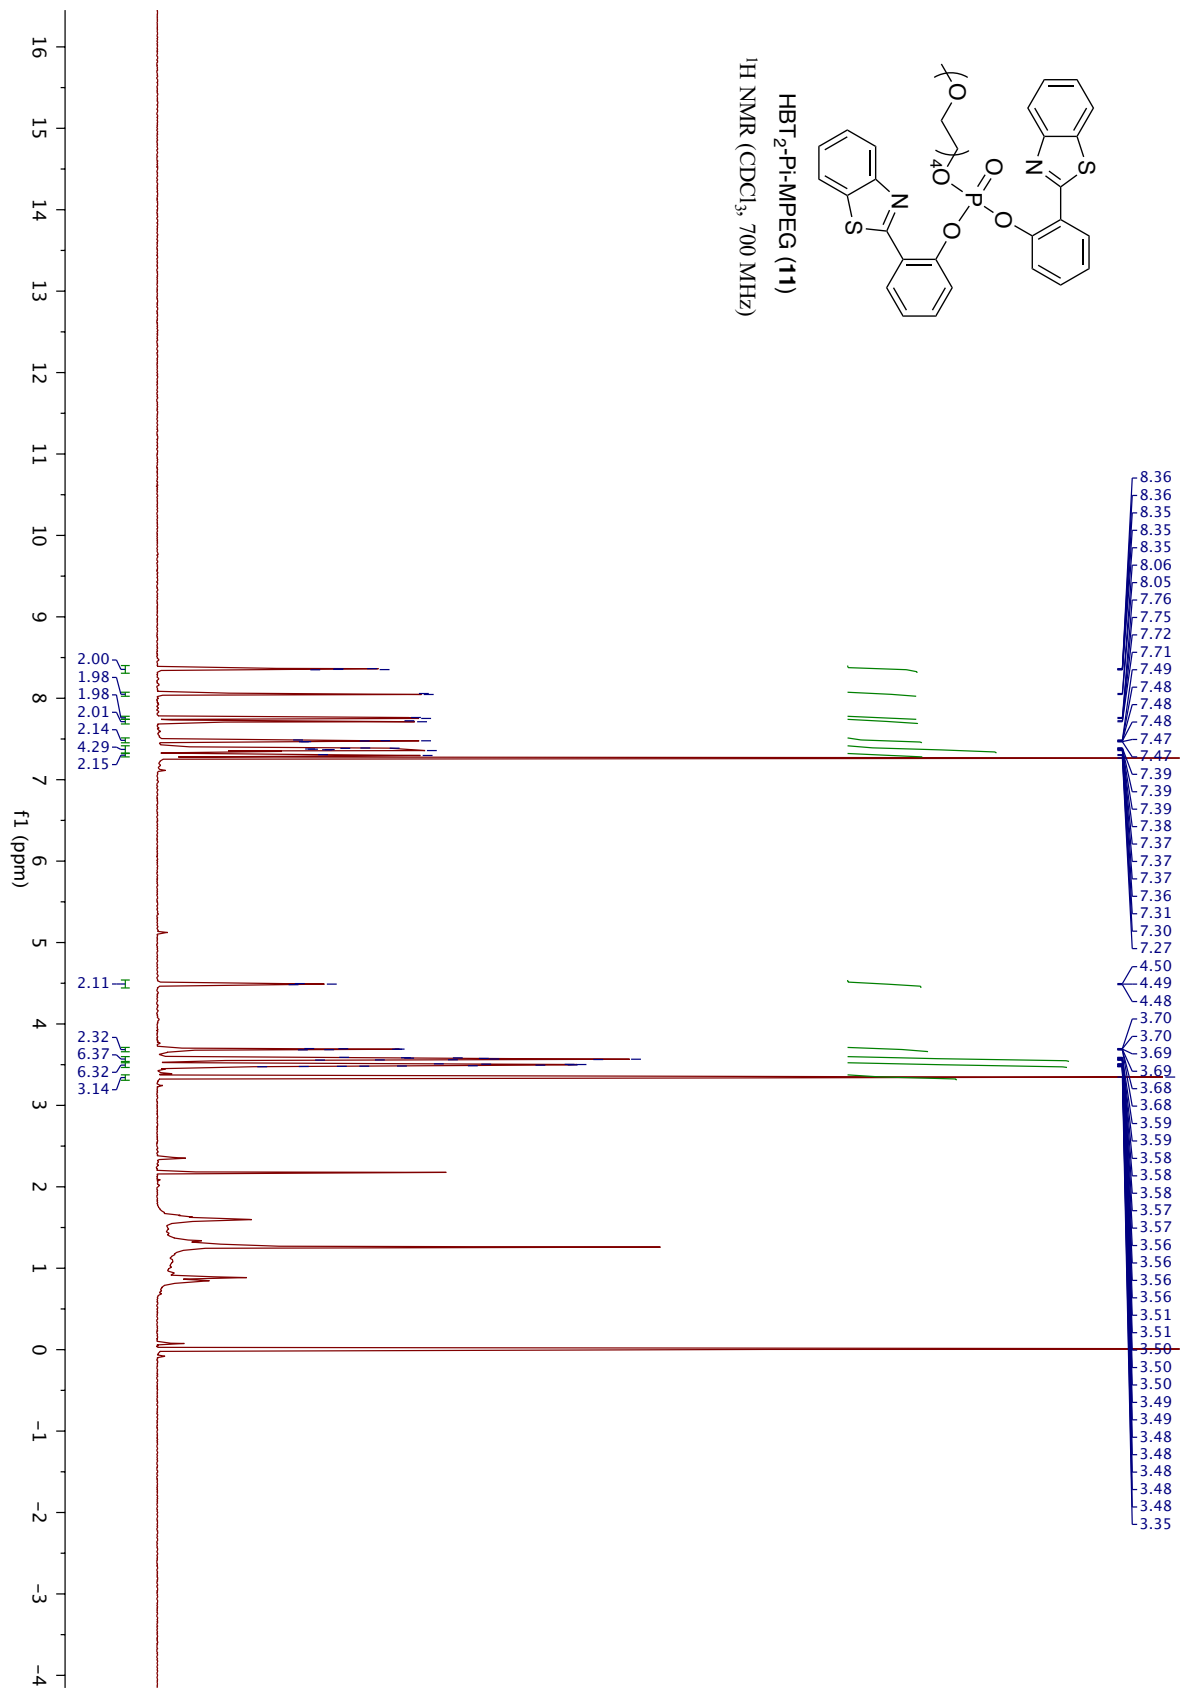

HBT<sub>2</sub>-P<sub>i</sub>-MPEG (11)  
<sup>13</sup>C NMR (CDCl<sub>3</sub>, 175 MHz)

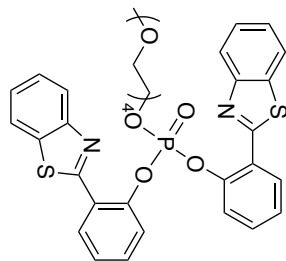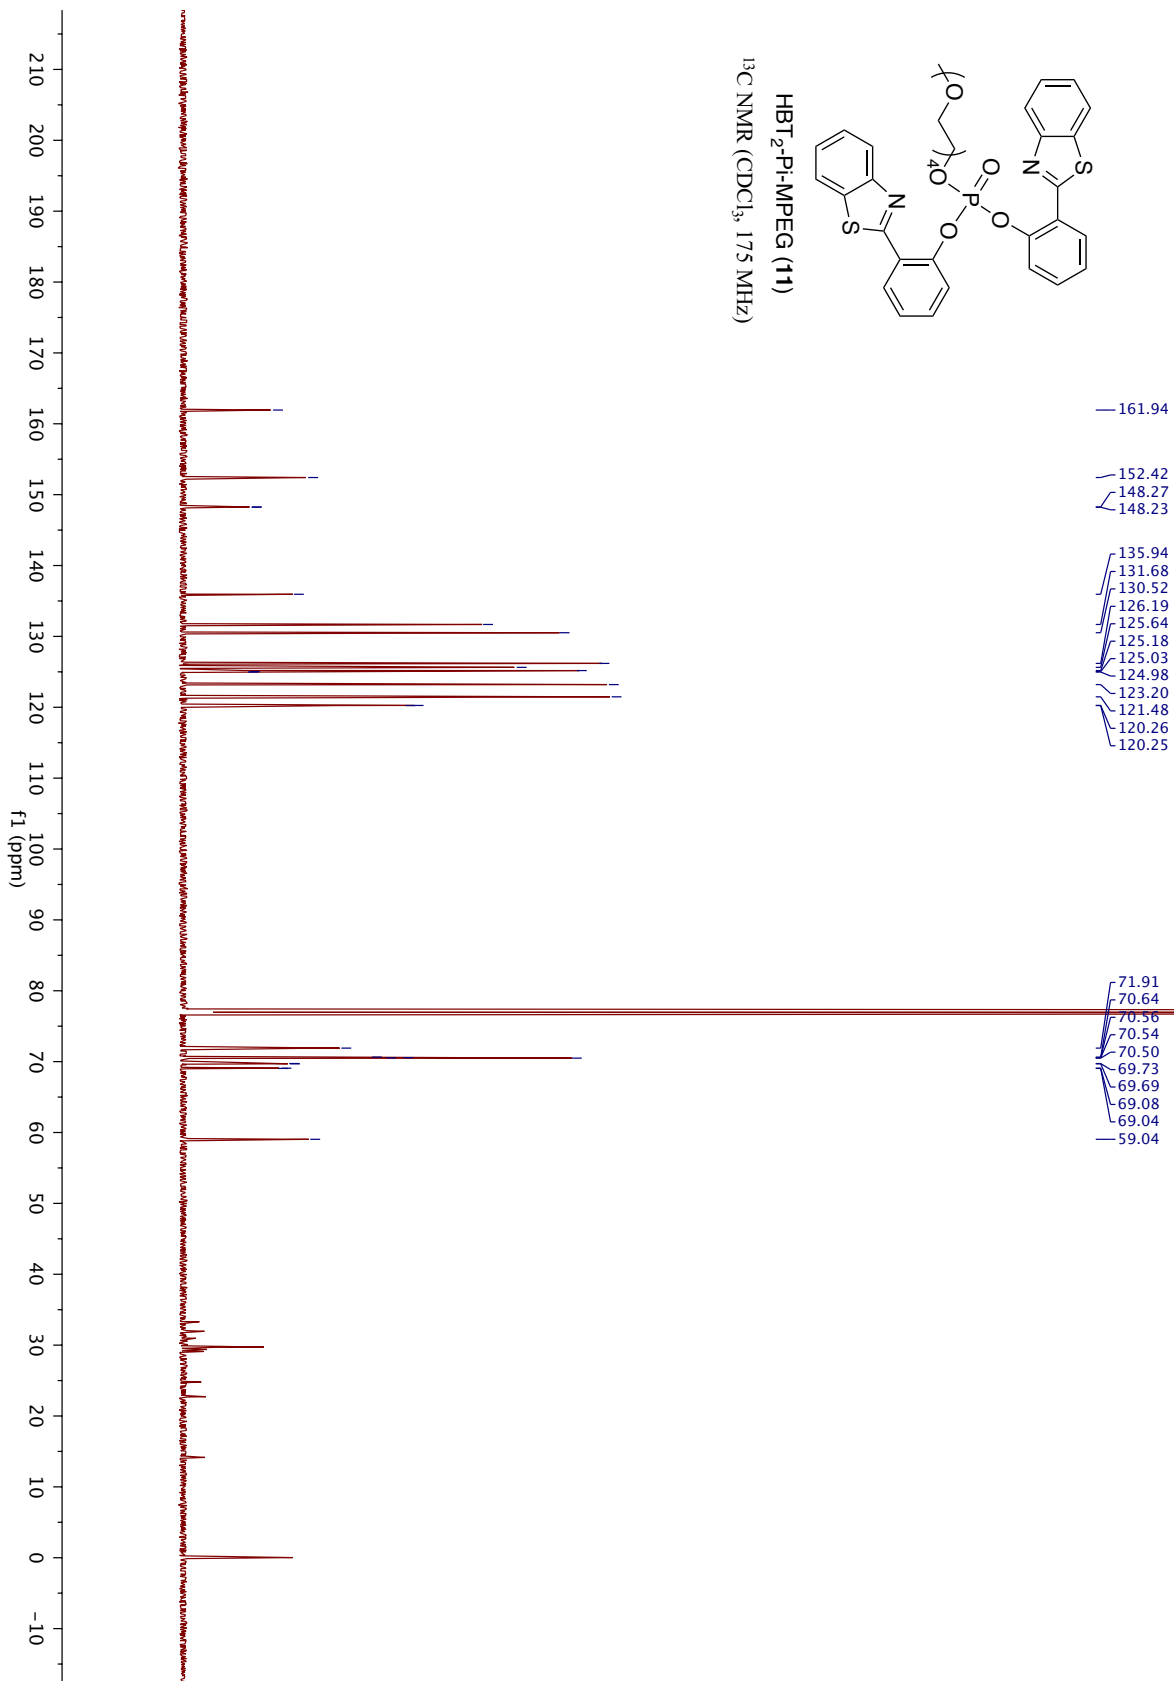

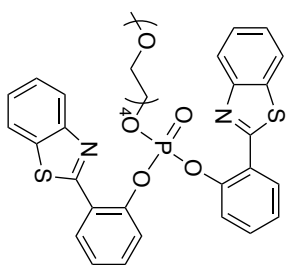

HBT<sub>2</sub>-Pi-MPEG (11)

<sup>31</sup>P NMR (CD<sub>3</sub>OD, 120 MHz)

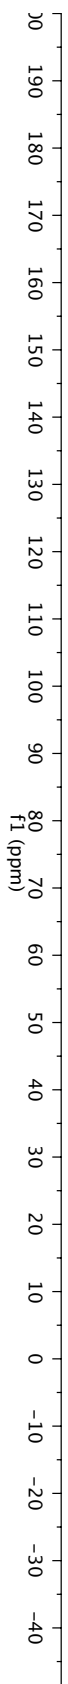

-13.11

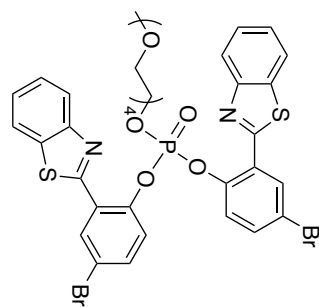

BrHBT<sub>2</sub>-P1-MPEG (13)

<sup>1</sup>H NMR (CDCl<sub>3</sub>, 600 MHz)

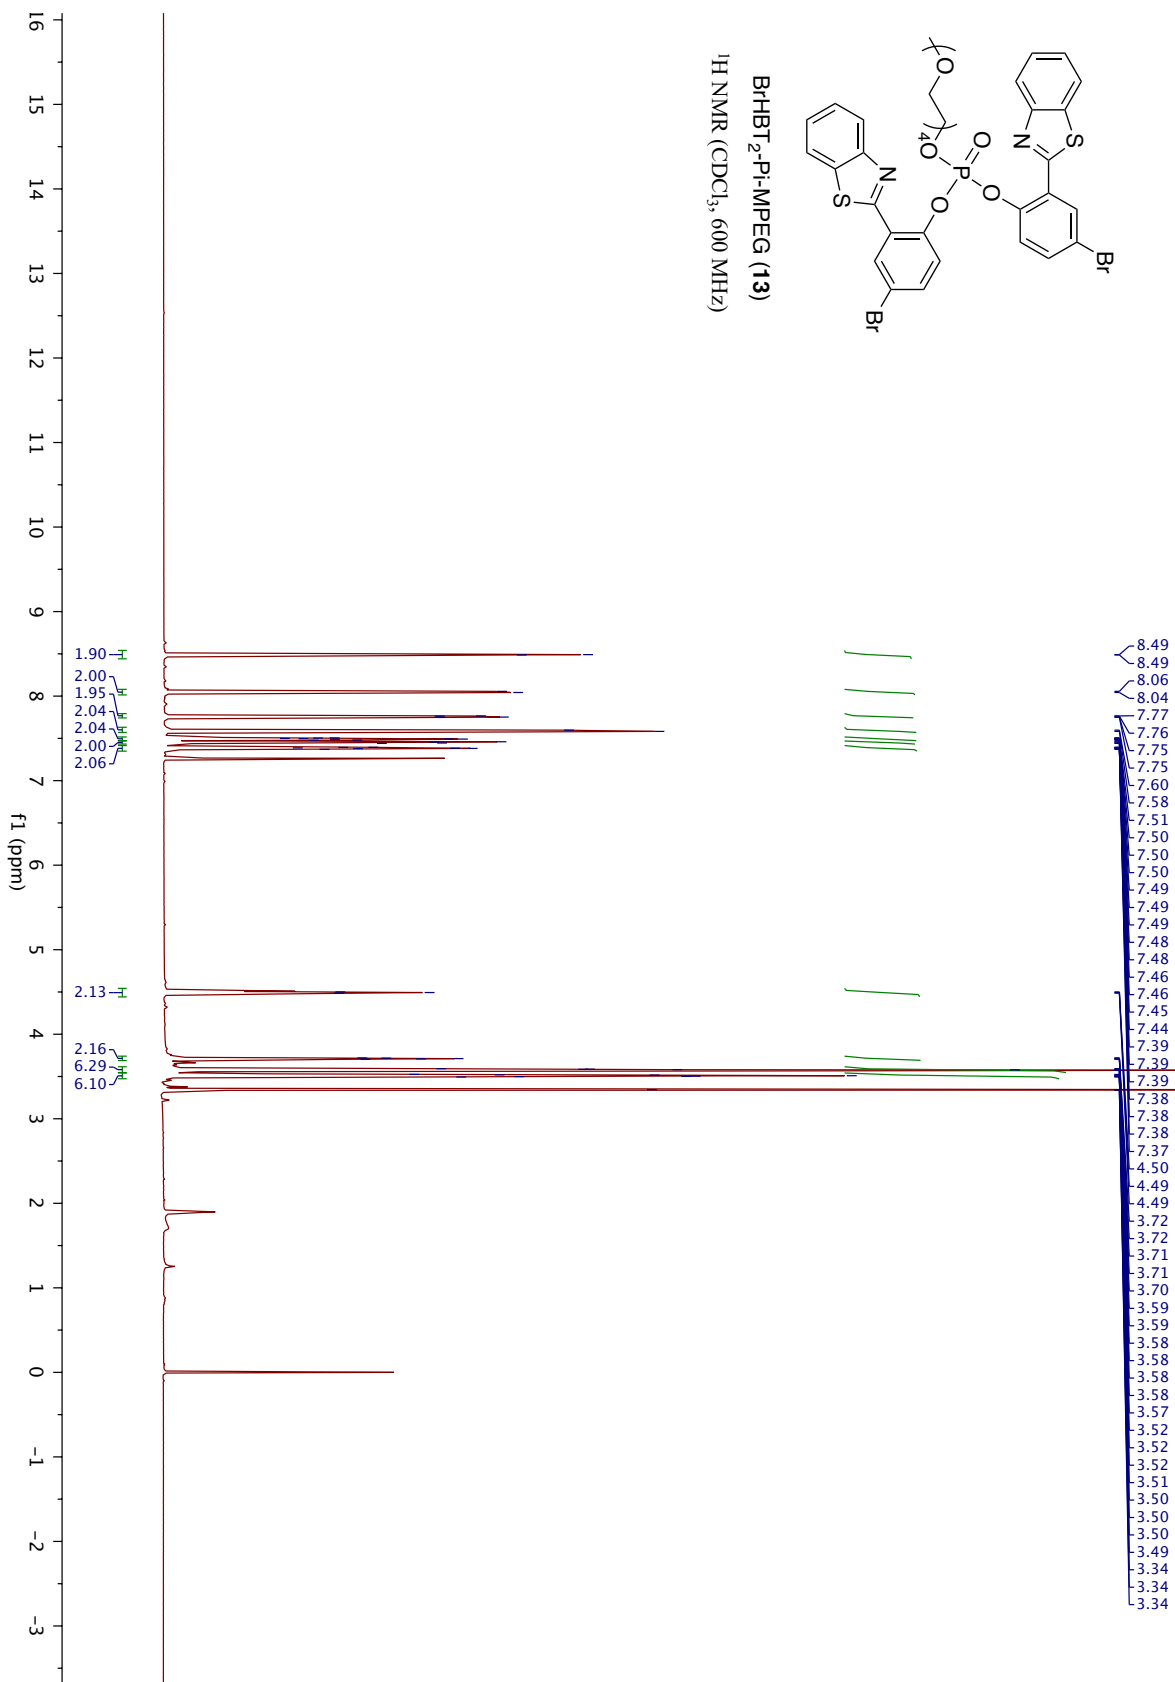

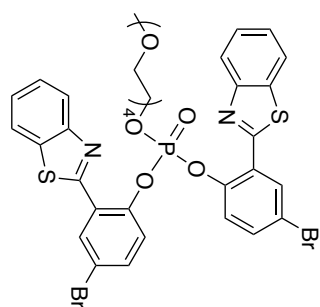

BHBT<sub>2</sub>-PI-MPEG (13)

<sup>13</sup>C NMR (CDCl<sub>3</sub>, 150 MHz)

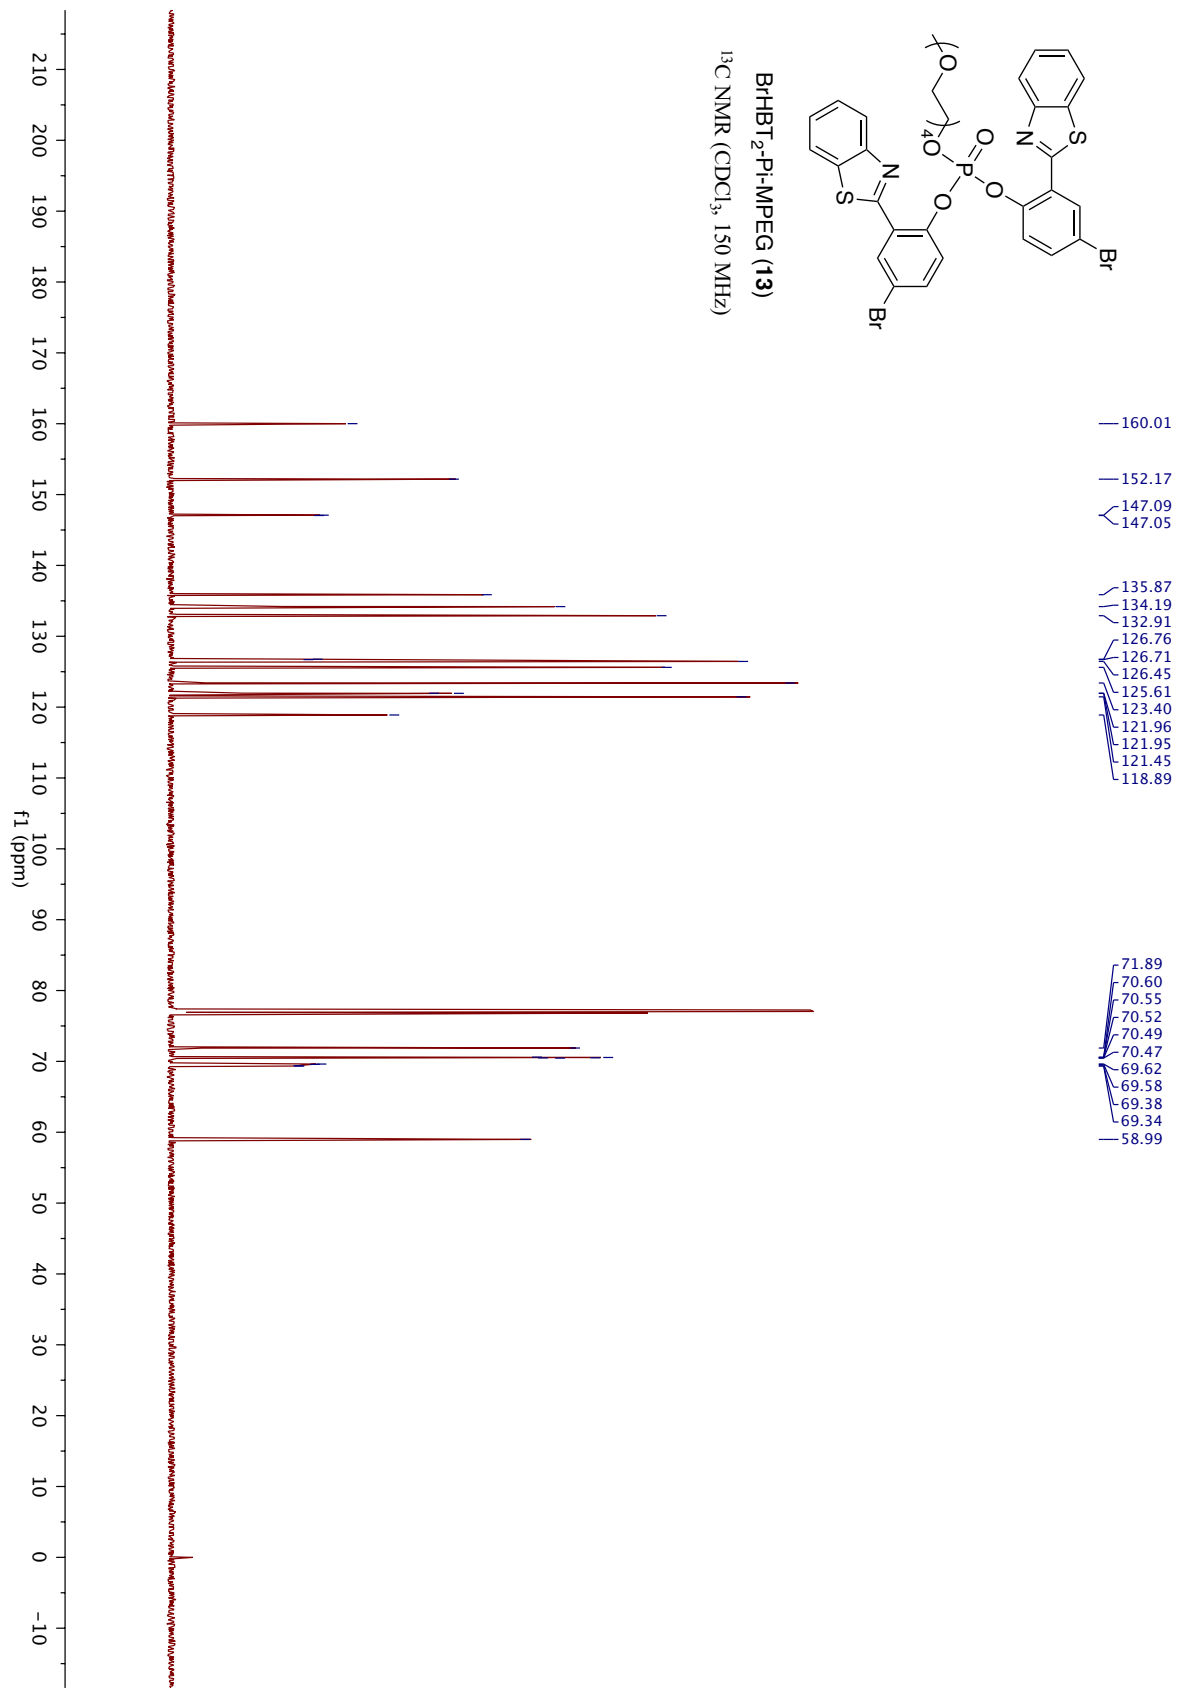



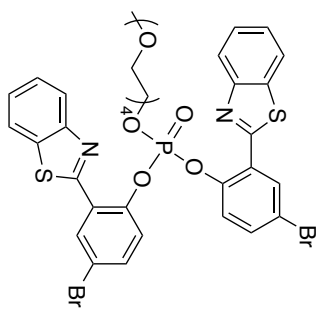

BHBT<sub>2</sub>-PI-MPEG (13)

<sup>31</sup>P NMR (CDCl<sub>3</sub>, 150 MHz)

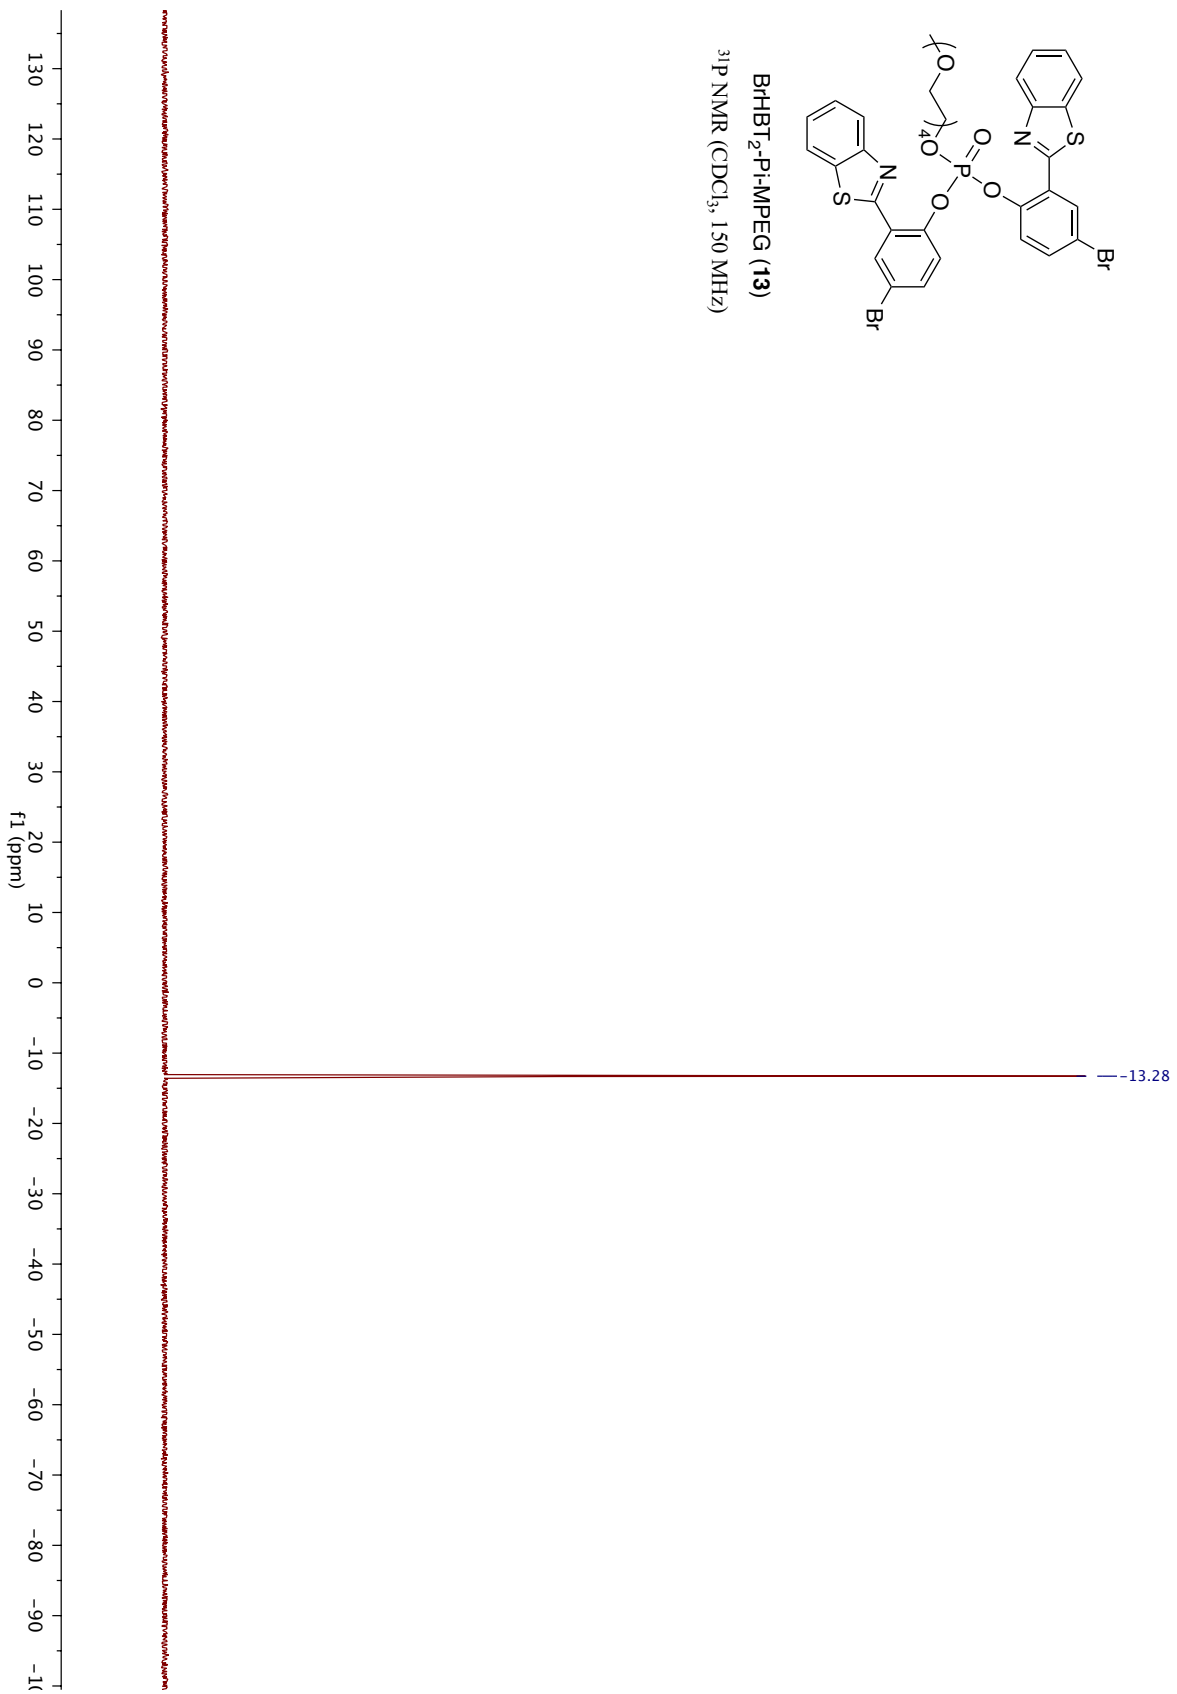

Supplement: d0nj03208e1.pdf [file d0nj03208e1.pdf]
